# Supplementary material
Source: PubMed Central journal article supplement (PMC6517273)
Supplement: EMS82145-supplement-Supplementary_information.pdf [file EMS82145-supplement-Supplementary_information.pdf]

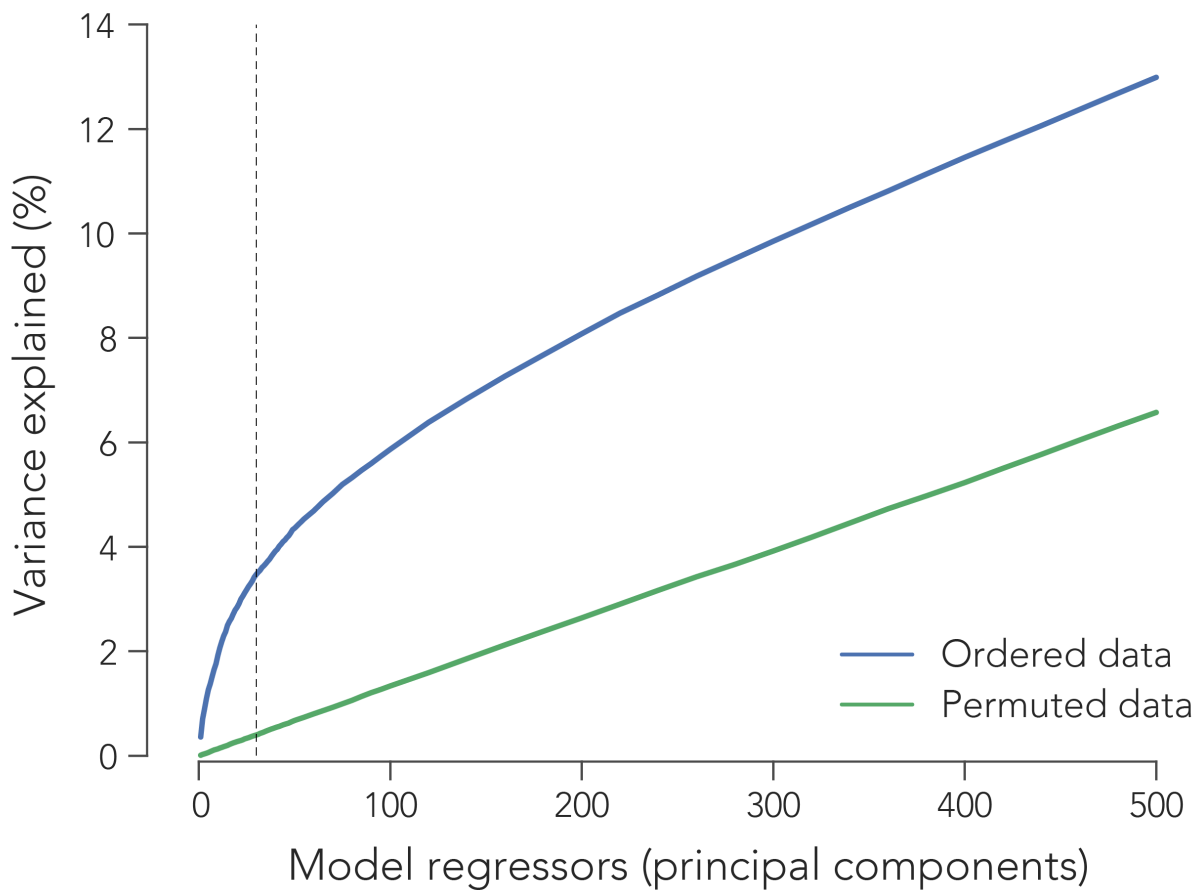

**Supplementary Figure 1.**

**Effect sizes varying with the number of microstructural principal components.**

Percentage variance explained by the multimodal regression model – functional connectivity predicted by microstructure – as a function of the number of principal components used as regressors (in blue), averaged across the homotopic region pairs. The green line represents the total variance explained by the models in which the rows (i.e., the subject entries) of the design matrix are randomly permuted. The dashed line indicates the number of principal components used in this study ( $p = 30$ ).

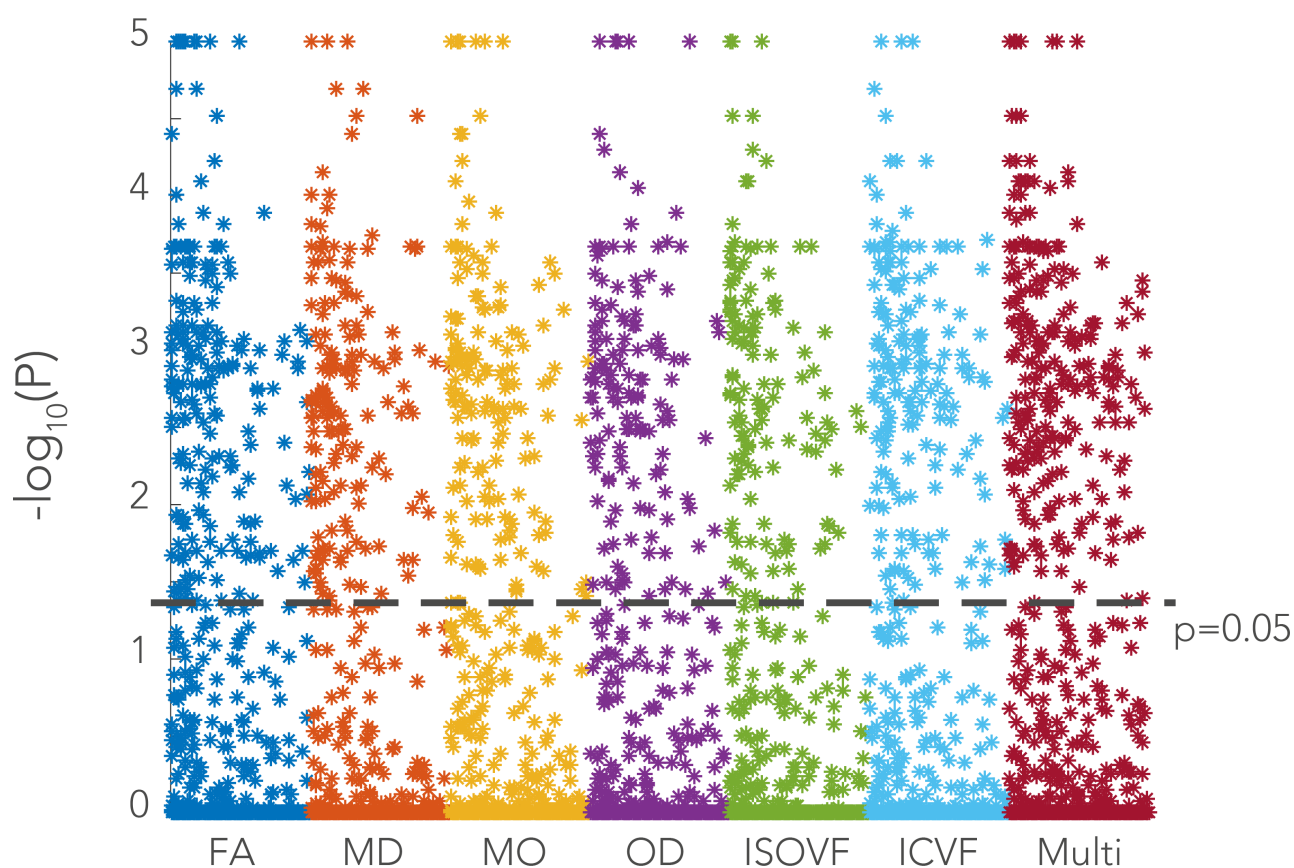

**Supplementary Figure 2.**

**Manhattan plot showing the p-values for the microstructure-function associations in the training cohort (n = 7481 subjects) depicted for each microstructural metrics separately.**

Significance was determined using permutation testing (n = 100,000 permutations, two-sided). Each dot represents a regressor's beta value that corresponds to a microstructural principal component in the regression models expressed as  $-\log_{10}(P)$ . All p-values are corrected for the family-wise-error, with  $p < 0.05$  is considered to be significant (see Fig. 3).

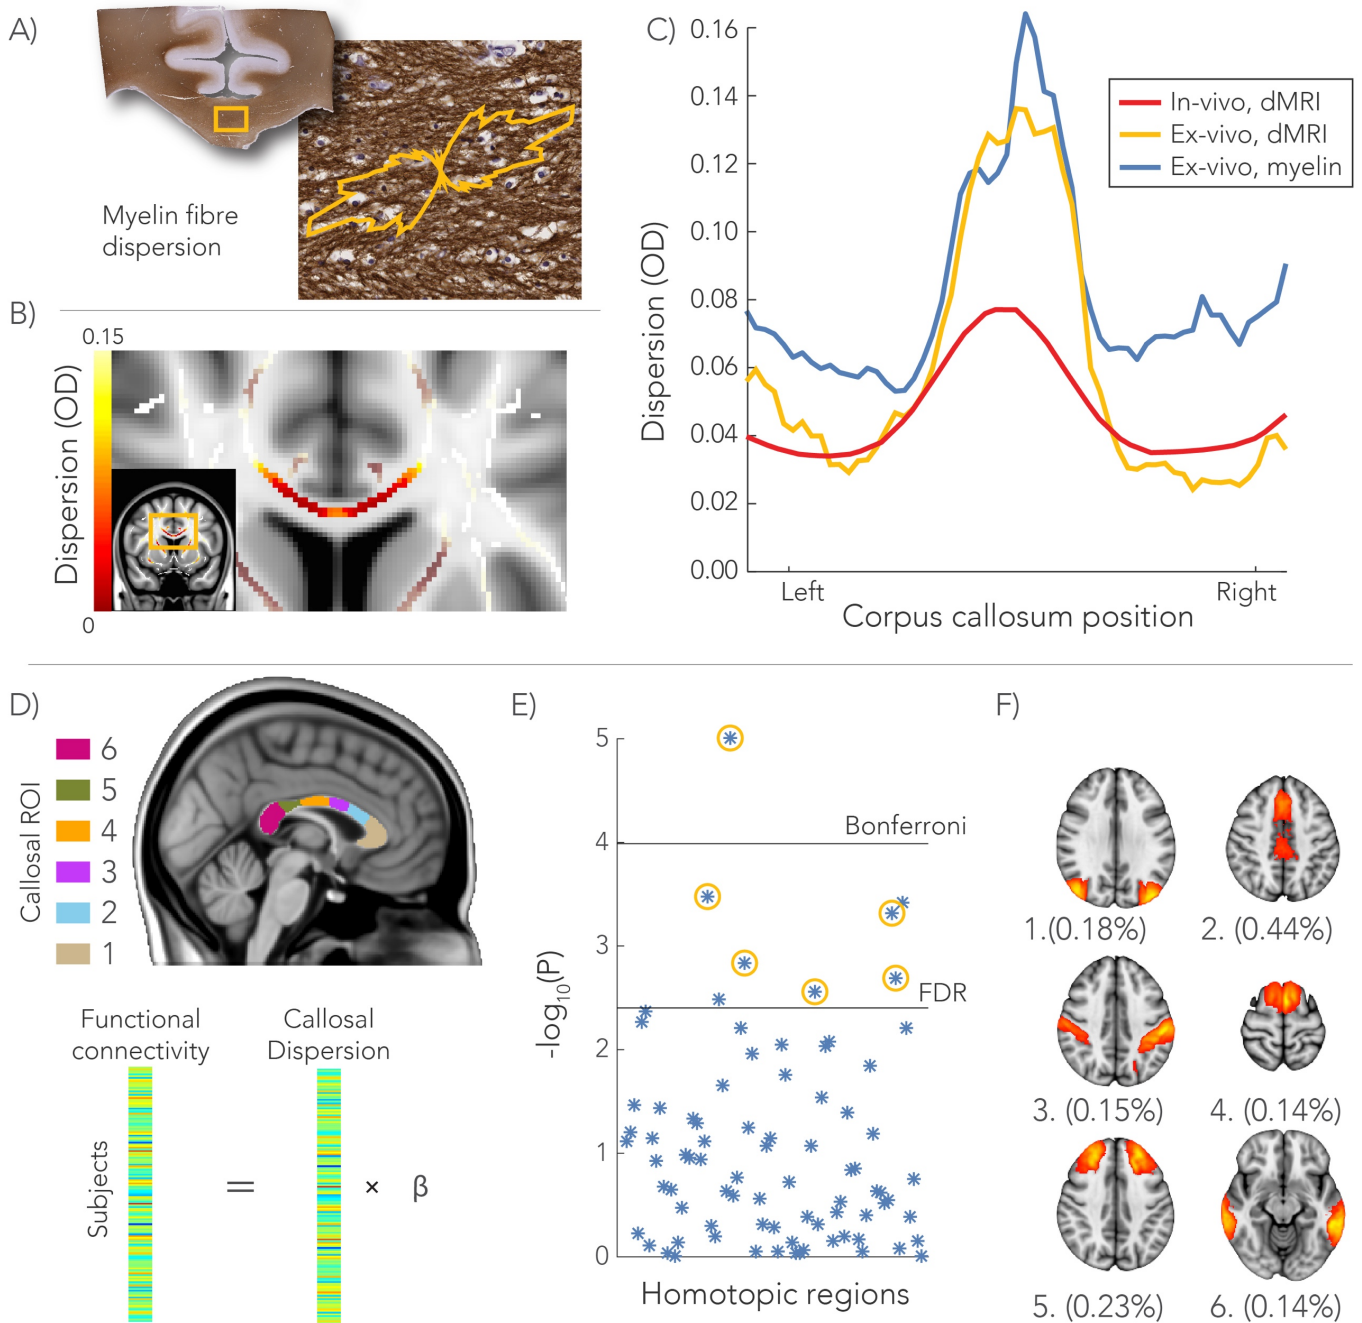

**Supplementary Figure 3.**

**Validation of fiber dispersion in the corpus callosum and its relation to interhemispheric functional connectivity.**

Ex-vivo brain specimens ( $n=3$ ) were scanned for dMRI and subsequently histologically stained for myelin (proteolipid protein, PLP). The pattern of fiber dispersion in the corpus callosum correlates well with dMRI dispersion of both the ex-vivo specimens as well as the in-vivo subjects from UK Biobank. For six homotopic pairs, functional connectivity was found to have a significant association with orientation dispersion in the relevant midline callosal ROI. **A)** Fiber dispersion was obtained from the histological myelin sections using texture analysis to evaluate fiber dispersion obtained from dMRI within the same specimen. **B)** OD map averaged across the in-vivo subjects in the corpus callosum projected onto the white matter skeleton. **C)** Dispersion profiles in the corpus callosum from the ex-vivo datasets in comparison to in-vivo subjects from UK Biobank. **D)** Prediction of functional connectivity from midline callosal dispersion derived from the in-vivo subjects. Dispersion was extracted from the callosal region having the highest overlap with the tract running between the homotopic regions of interest (ROIs). **E)** Manhattan plot showing the association (linear regression with permutation testing, two-sided) between callosal dispersion and functional connectivity for all homotopic regions in the training cohort ( $n = 7481$  subjects). Dots above the false discovery rate (FDR) threshold are considered to be significant. The yellow circles also survived the negative control analysis (i.e. strongest correlation with dispersion from the anatomical correct callosal ROI in comparison to all other callosal ROIs). **F)** Spatial ICA maps of the homotopic regions corresponding to the yellow circles (E) with the percentage of functional connectivity variance explained.

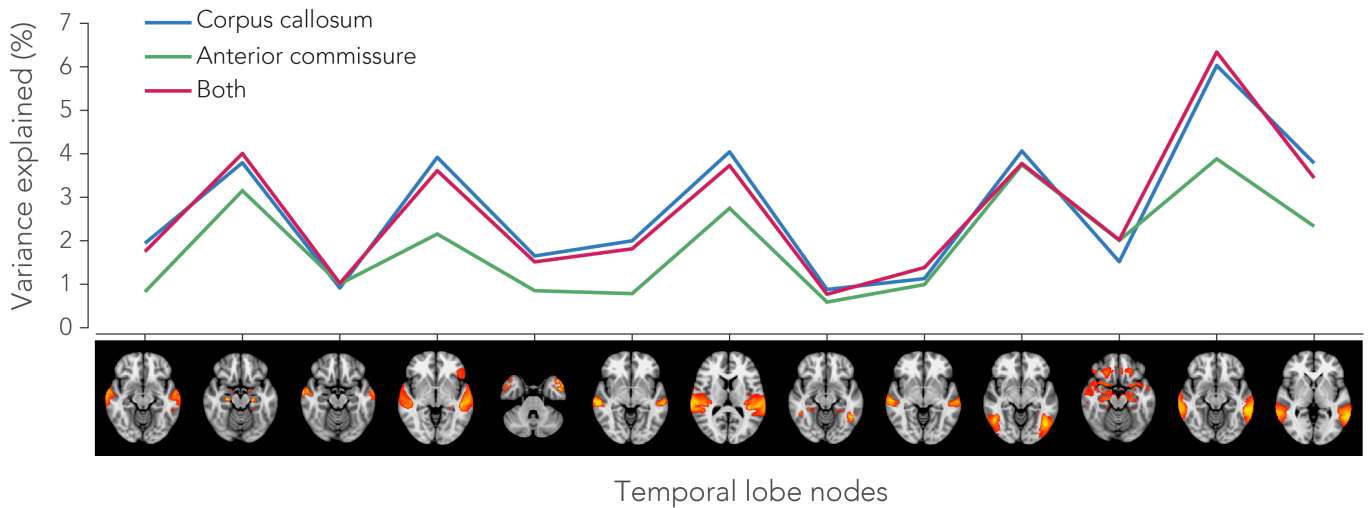

**Supplementary Figure 4.**

**Effect sizes for the temporal lobe brain regions.**

Percentage variance explained in functional connectivity between temporal lobe regions by the microstructural signature from either the corpus callosum, the anterior commissure or both. While temporal lobe regions are also connected through the anterior commissure, microstructural information from this pathway is in general not better in explaining temporal lobe functional connectivity than callosal microstructure, nor does a combination of both pathways.

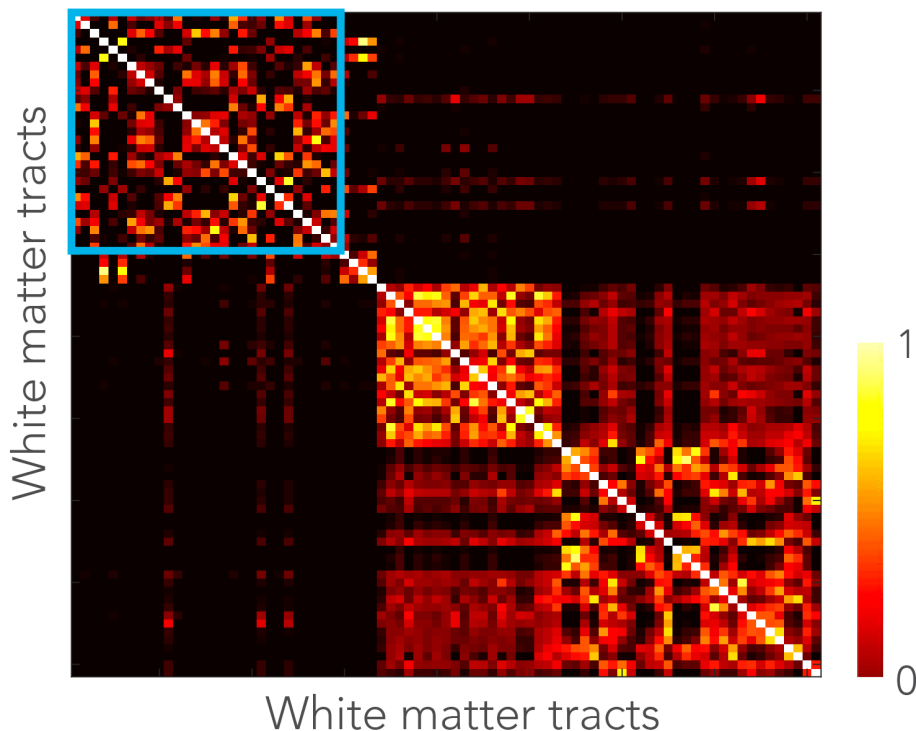

**Supplementary Figure 5.**

**Spatial overlap among the 81 white matter tracts.**

Each entry expresses the Dice similarity index between two white matter tracts. An index of 0 indicate no spatial overlap at all, while tract pairs with an index of 1 are perfectly overlapping. The tracts are sorted in this matrix after k-means clustering. The light-blue rectangle indicates the 30 tracts that had minimal spatial overlap and were used as control ("wrong") tracts in the negative control analysis.

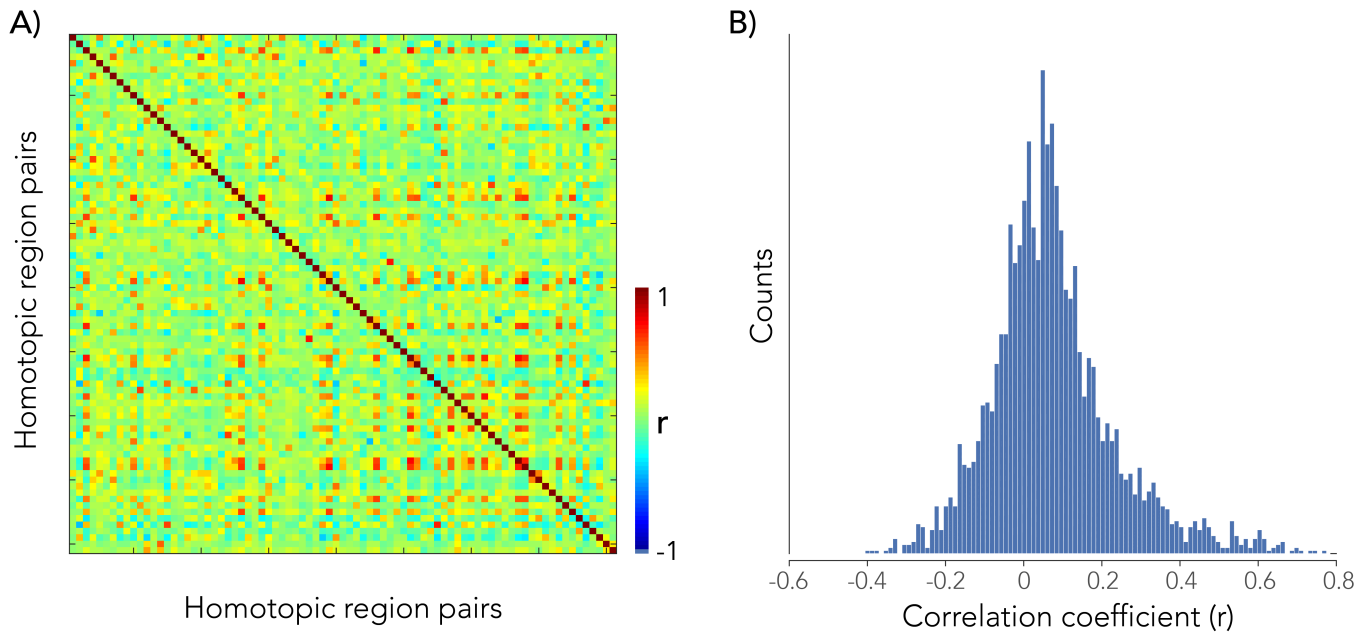

**Supplementary Figure 6.**

**Correlation between model fits using the multimodal microstructure model to predict functional connectivity.**

**A)** Correlation matrix depicting the Pearson correlation coefficient of the model fits between all homotopic region pairs. **B)** Histogram of the off-diagonal correlation coefficients.

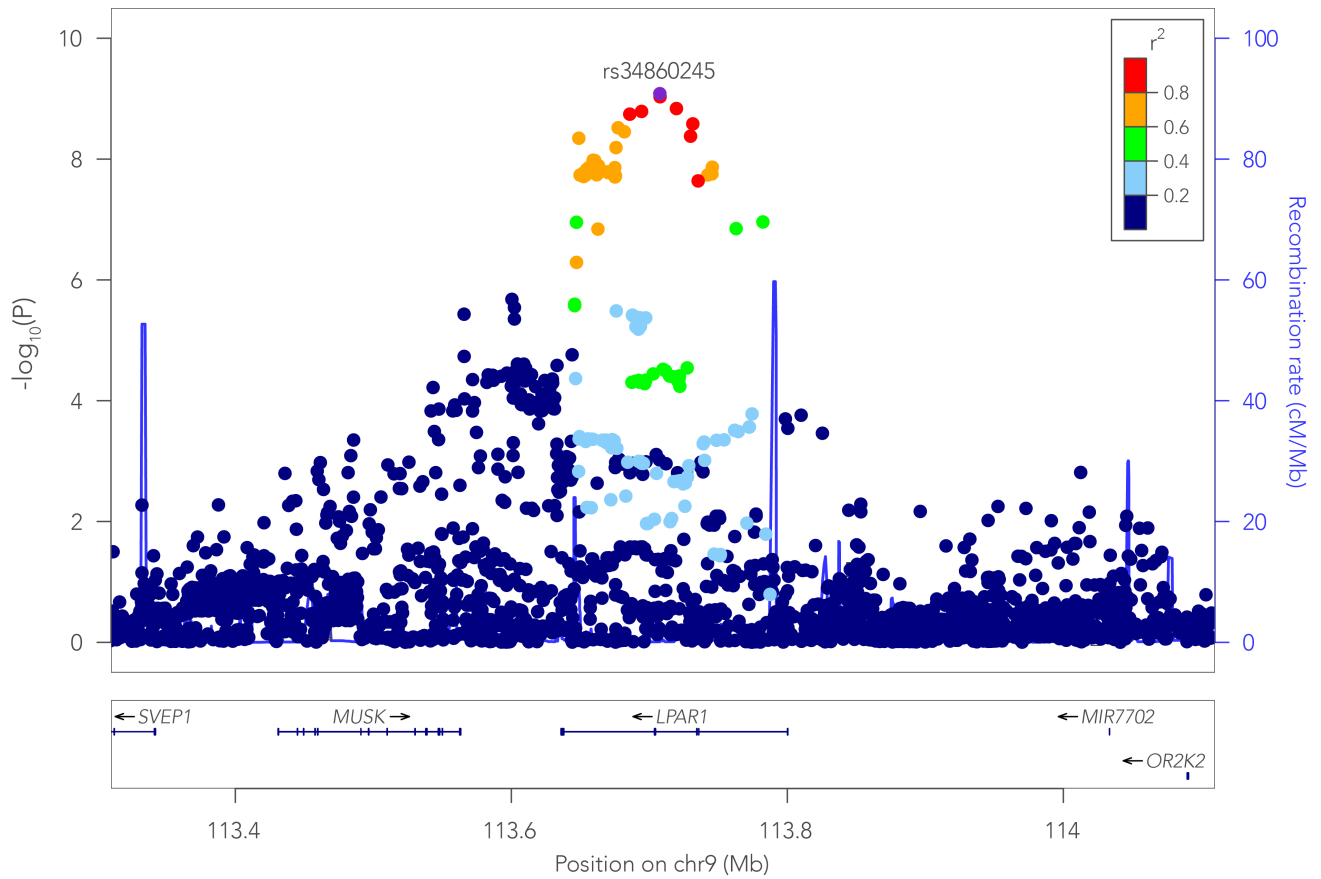

**Supplementary Figure 7.**

**Genetic associations around the LPAR1 gene.**

Genetic association (linear regression, two-sided) with the microstructure-function phenotype (i.e. the pattern of functional connectivity that can be predicted from white matter microstructure) centered around SNP rs34860245 in chromosome 9 for the discovery cohort ( $n = 7481$  subjects). Points are colour-coded by the local linkage disequilibrium with the top hit SNP (in purple). Associations were estimated using univariate regressions, two-sided). The significance threshold was set to a  $-\log_{10}(p\text{-value})$  equal to 7.5 corresponding to a  $p\text{-value}$  of  $\sim 3 \times 10^{-8}$ .

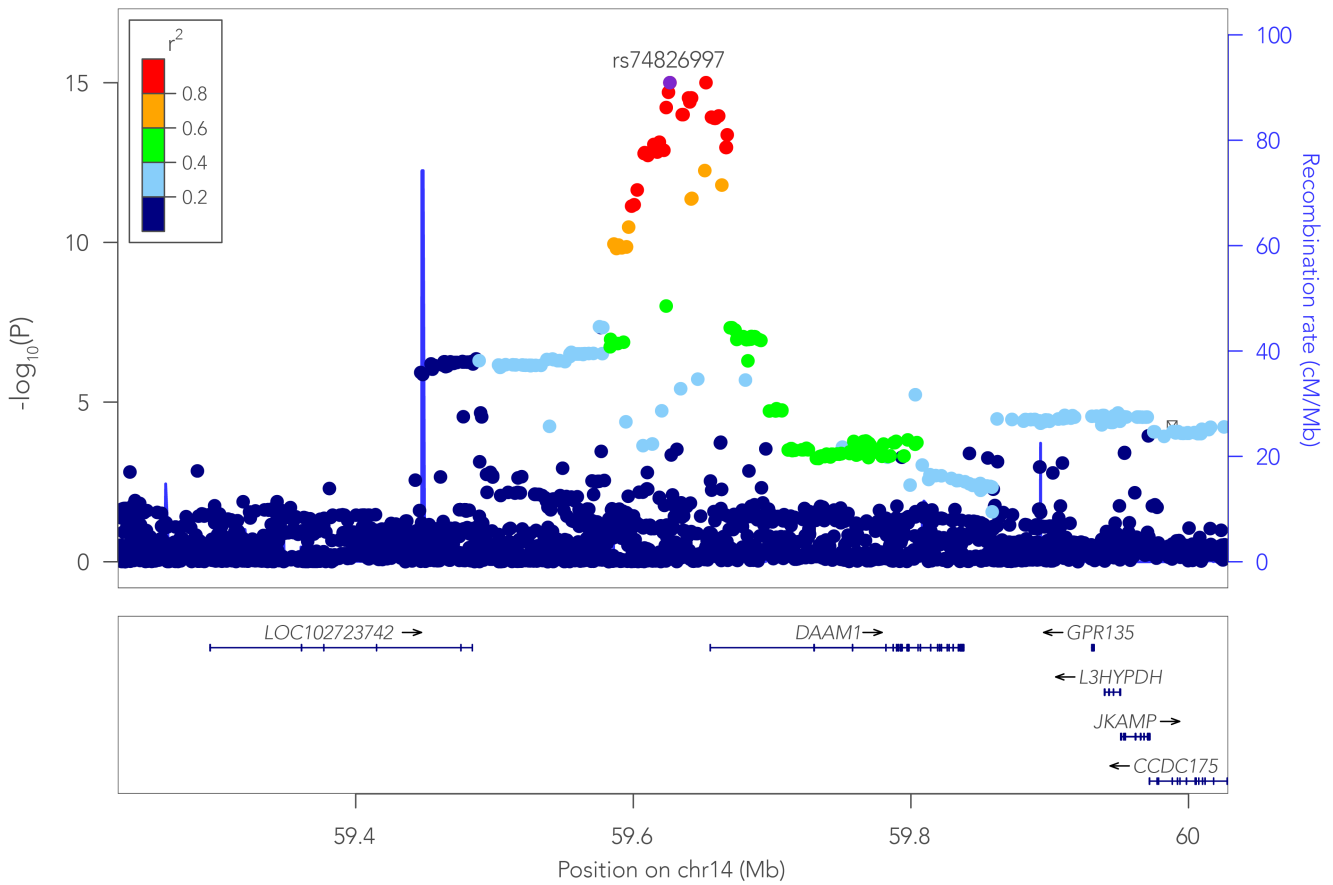

**Supplementary Figure 8.**

**Genetic associations around the DAAM1 gene.**

Genetic association (linear regression, two-sided) with the microstructure-function phenotype (i.e. the pattern of functional connectivity that can be predicted from white matter microstructure) centred around SNP rs74826997 in chromosome 9 for the discovery cohort ( $n = 7481$  subjects). Points are colour-coded by the local linkage disequilibrium with the top hit SNP (in purple). The significance threshold was set to a  $-\log_{10}(p\text{-value})$  equal to 7.5 corresponding to a  $p\text{-value}$  of  $\sim 3 \times 10^{-8}$ .

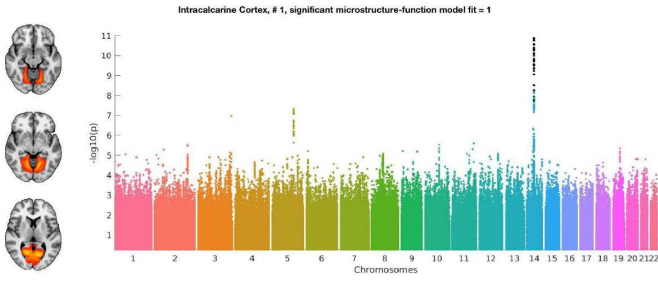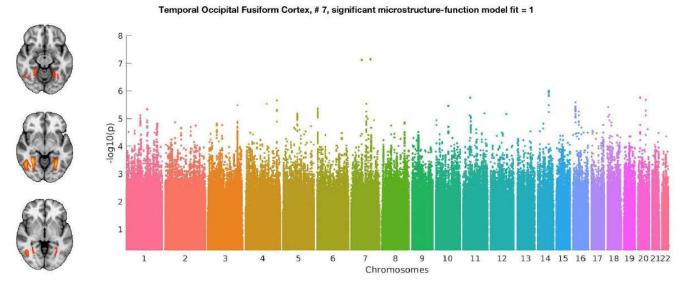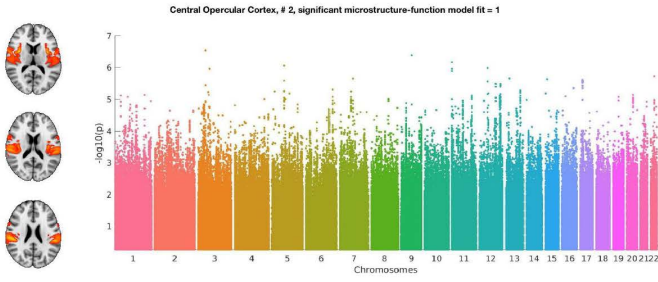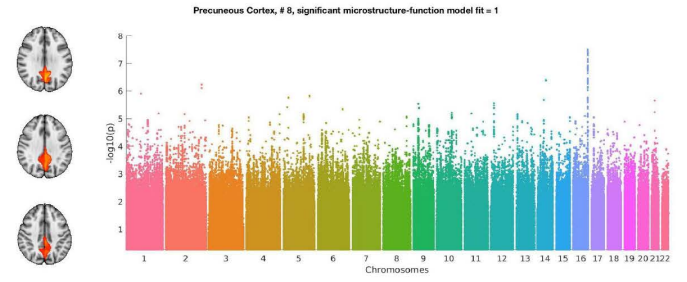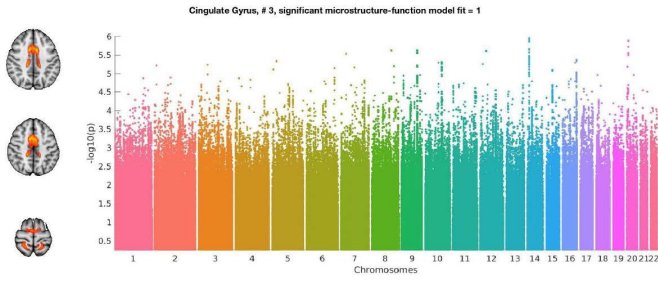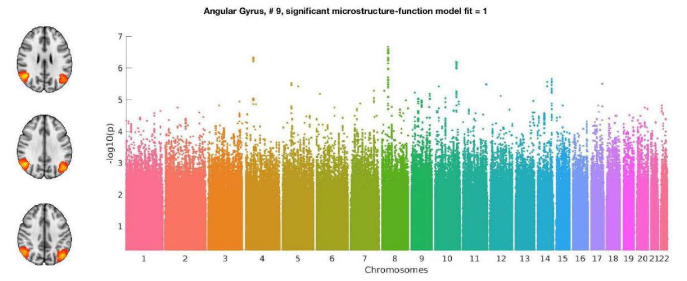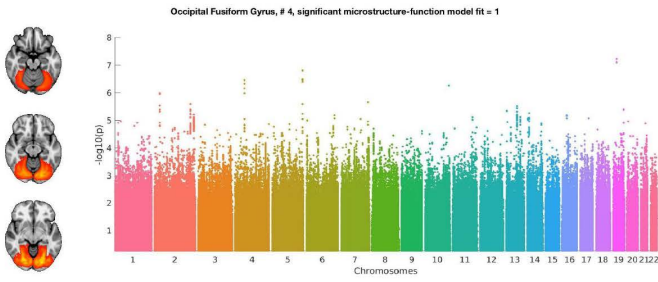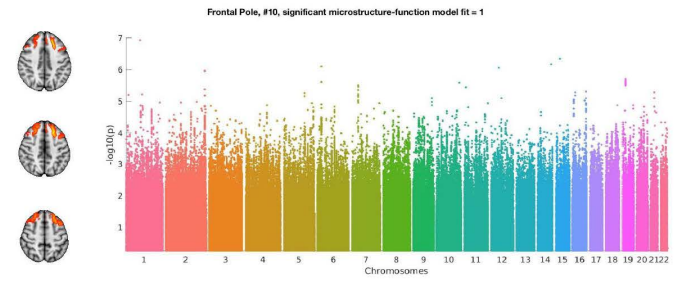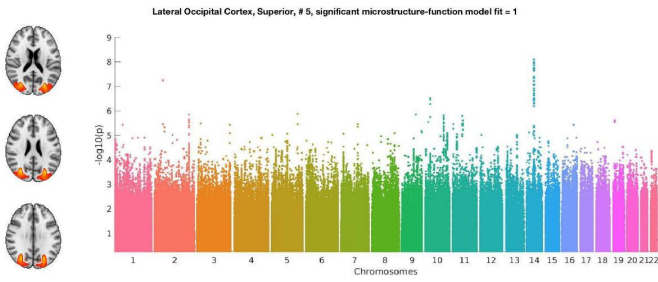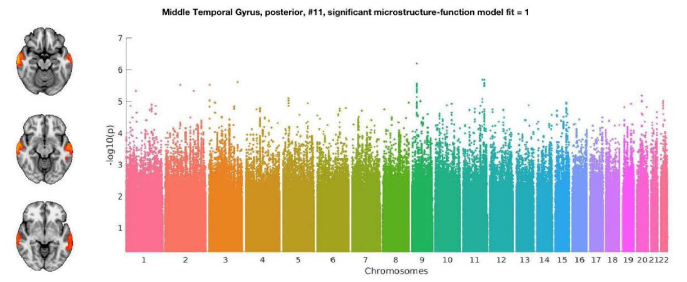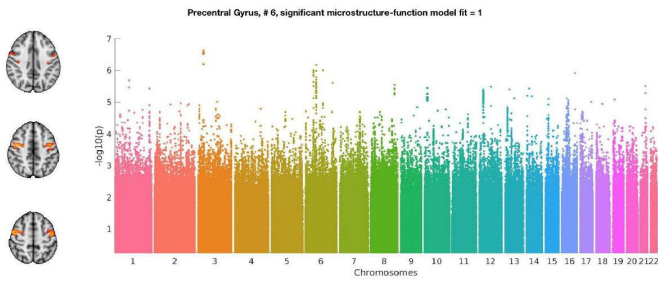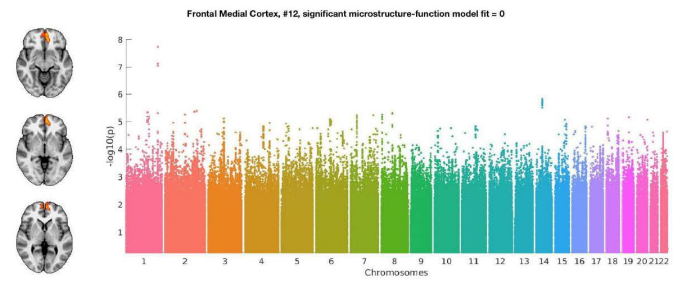



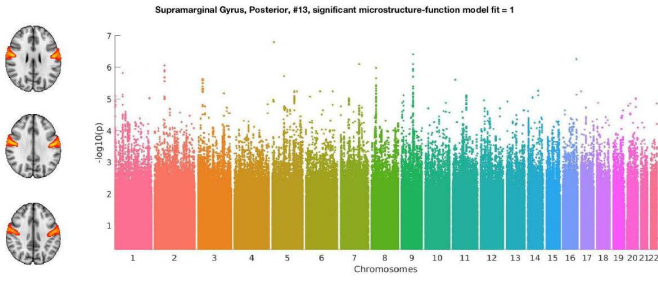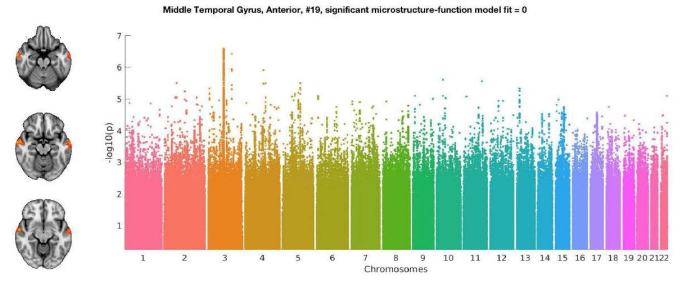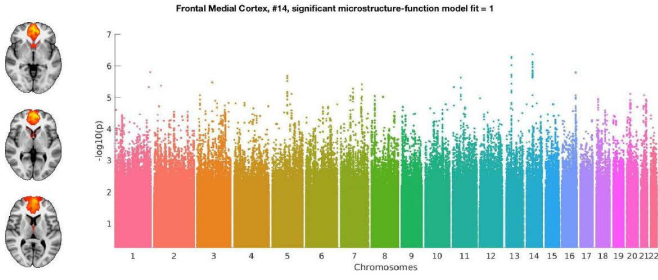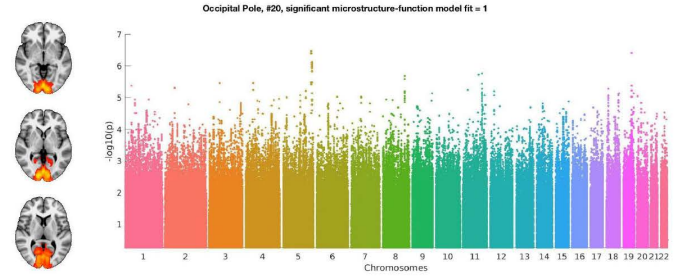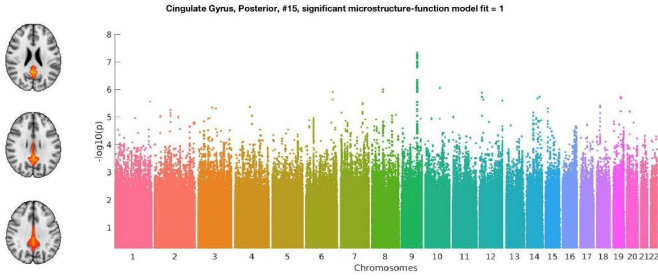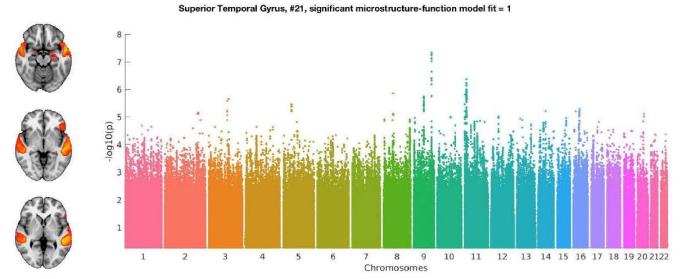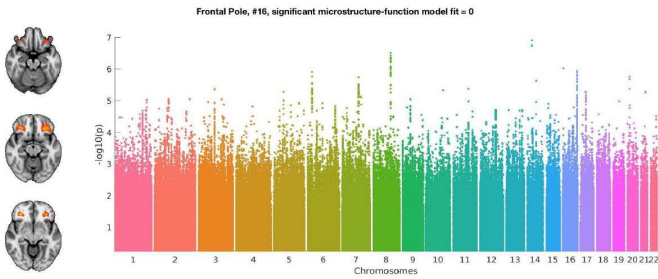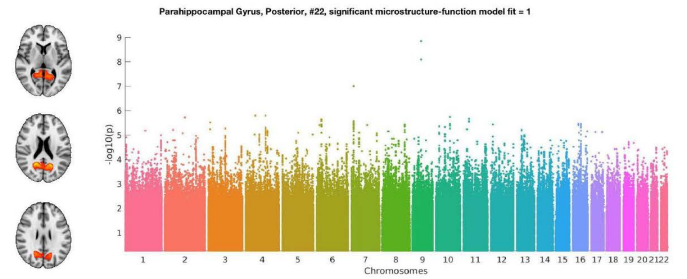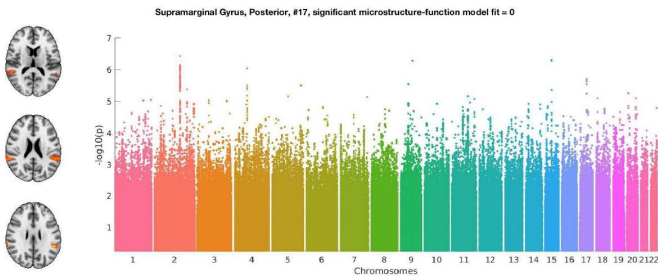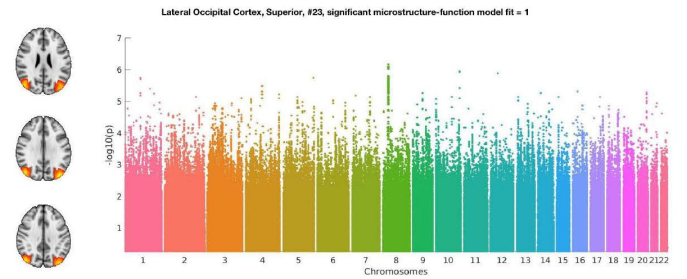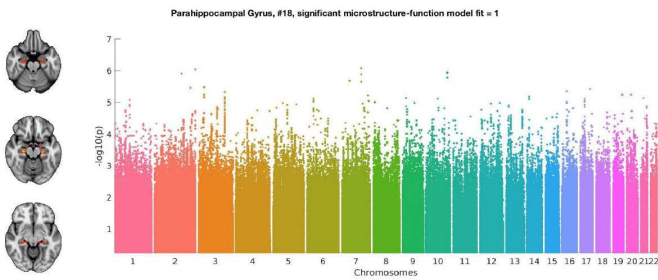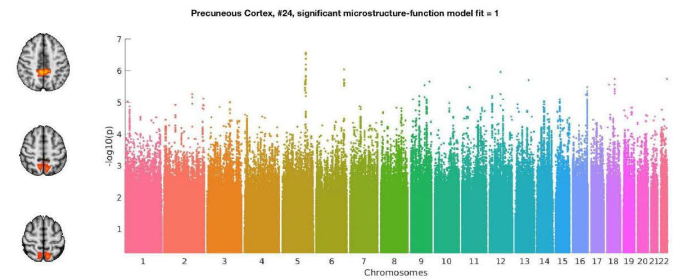

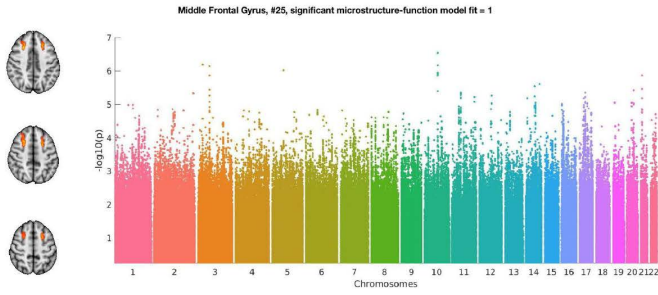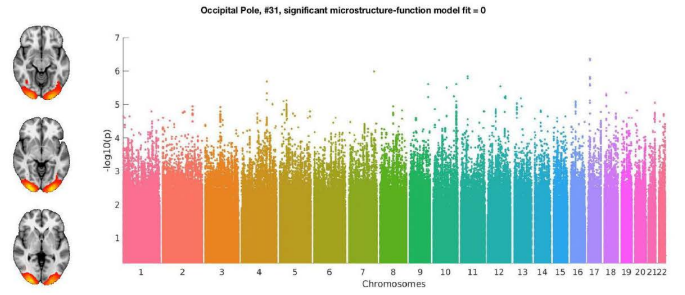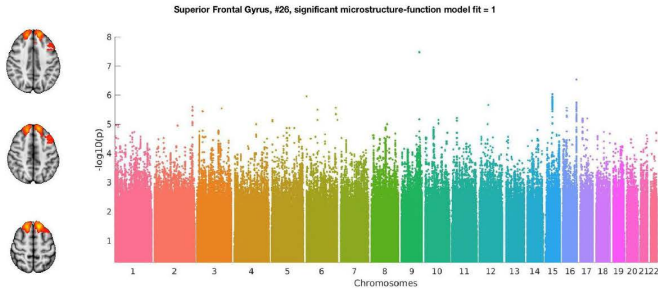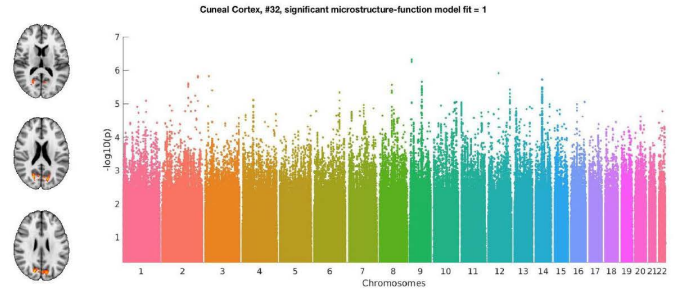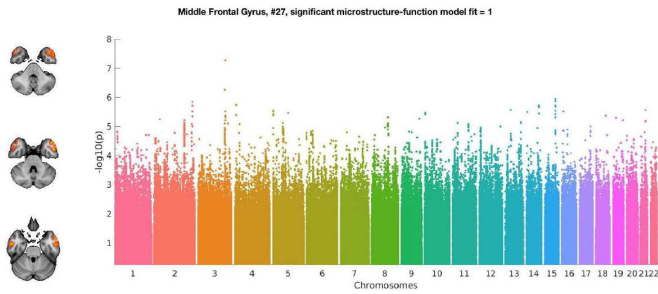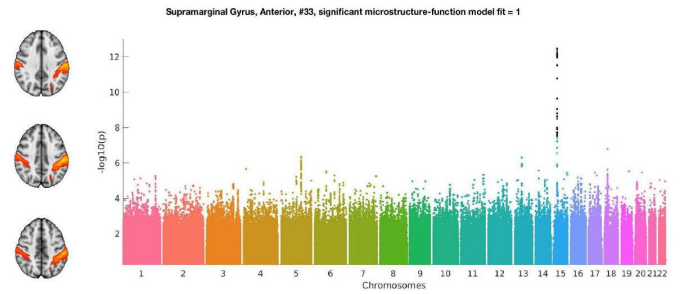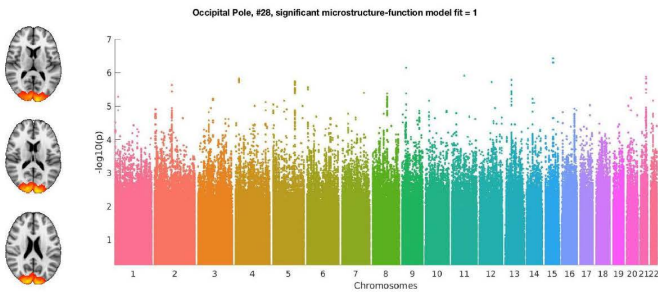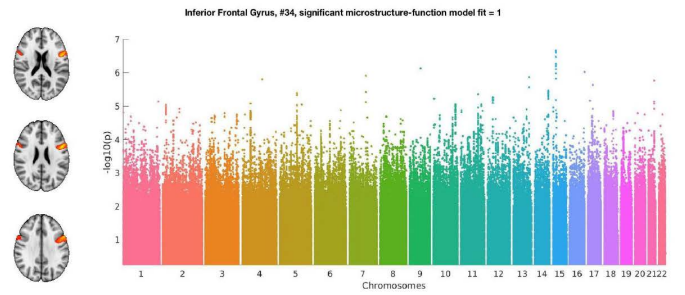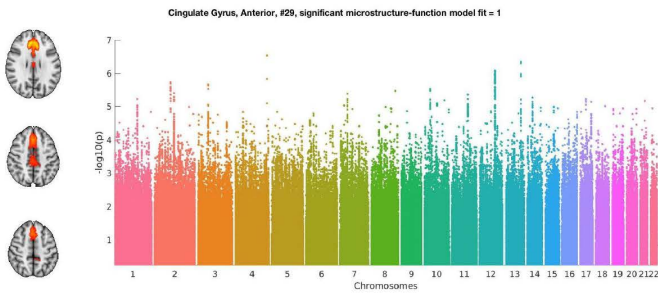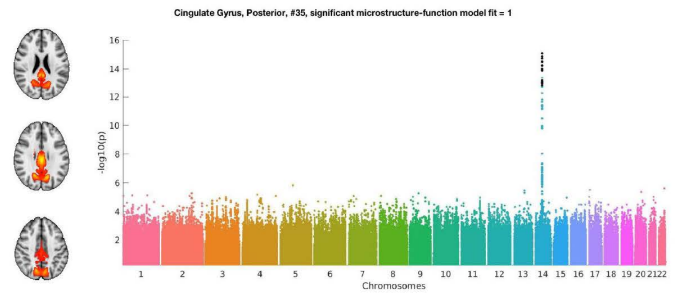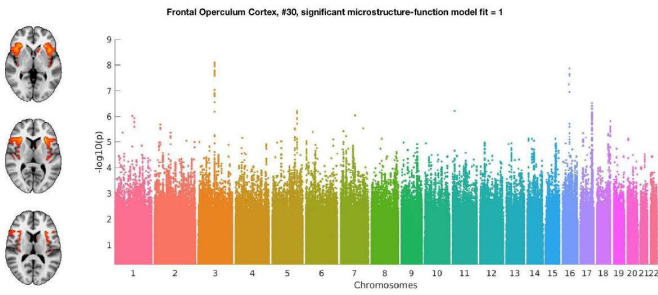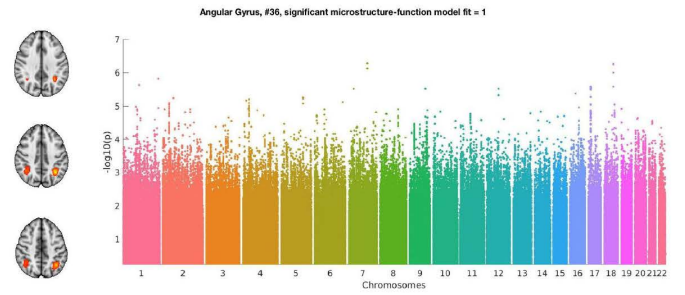

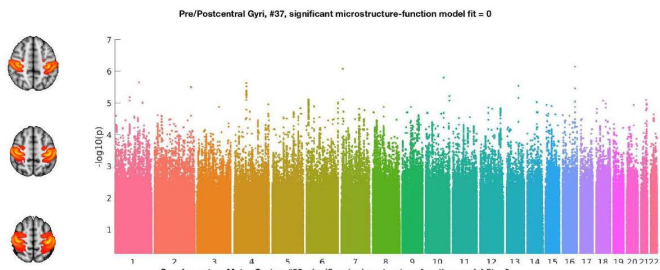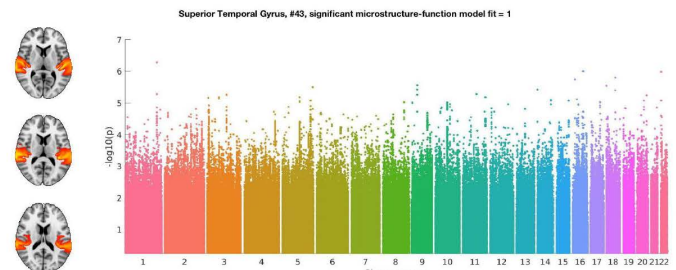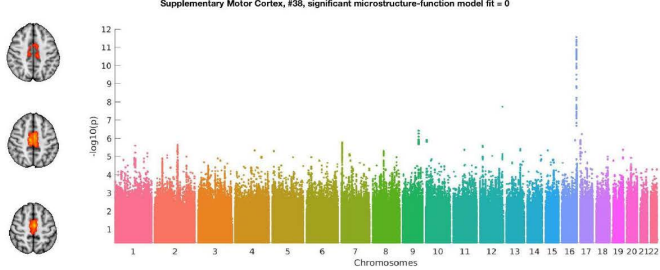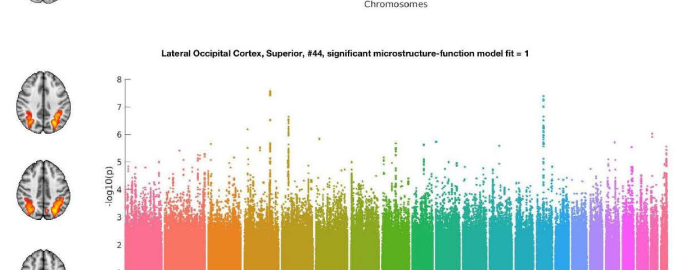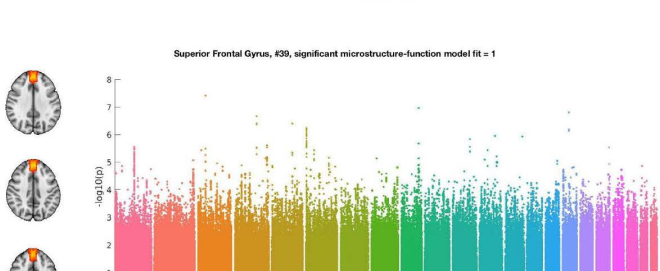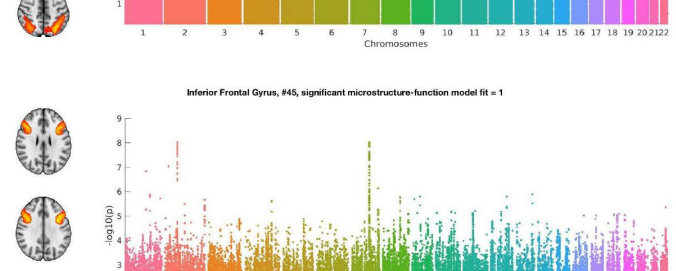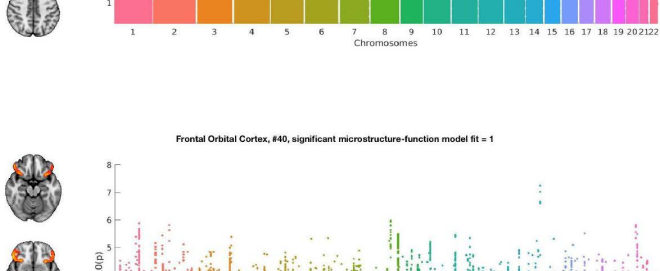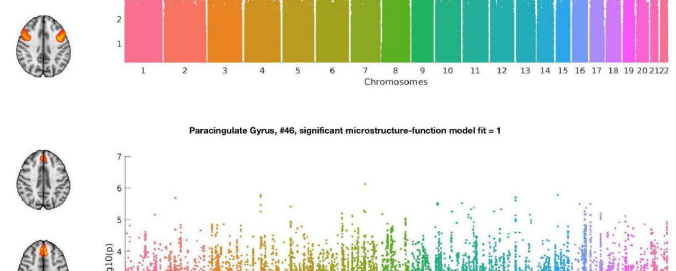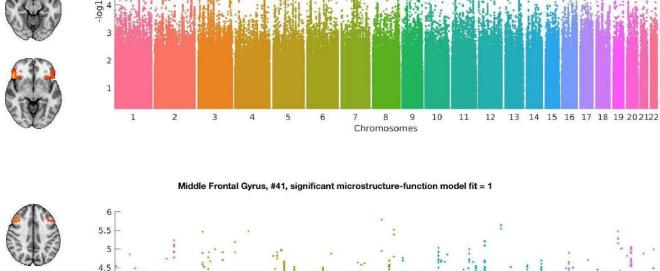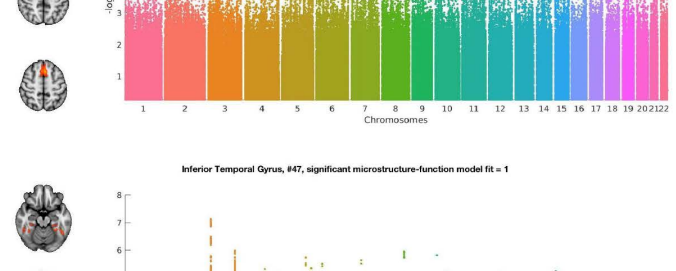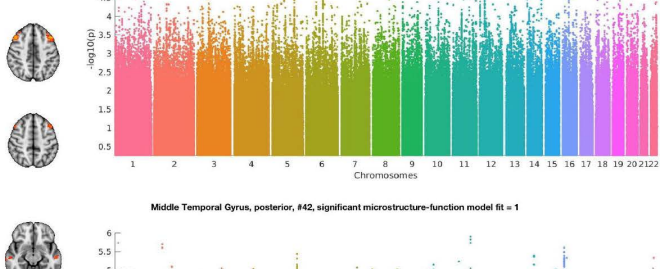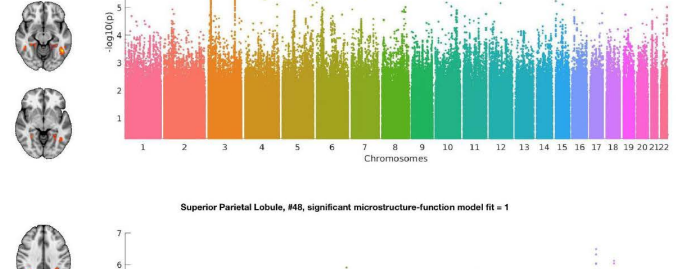

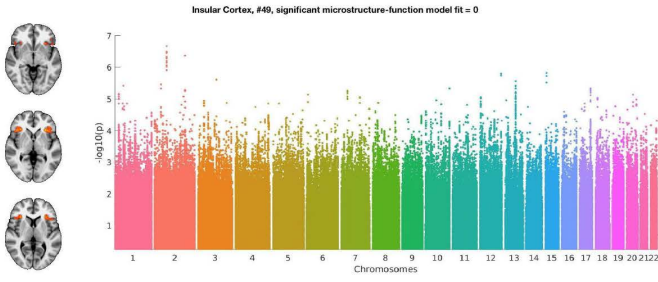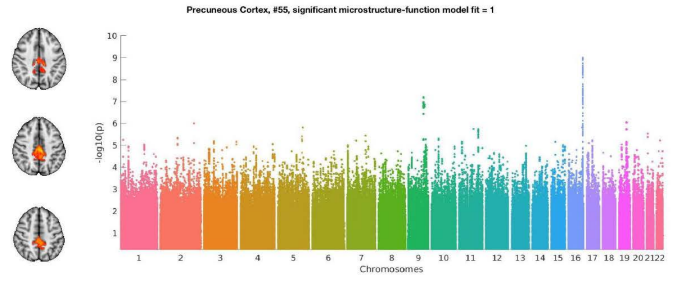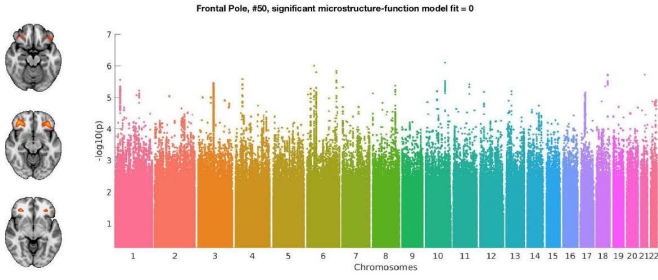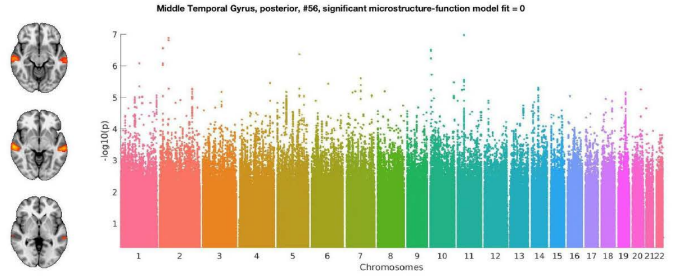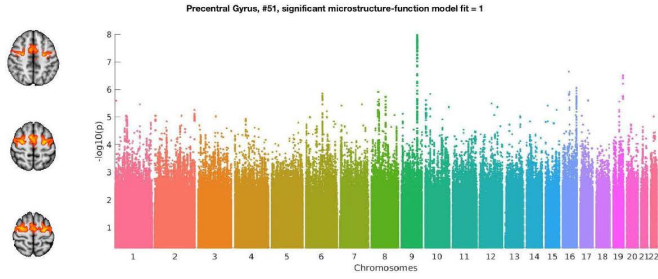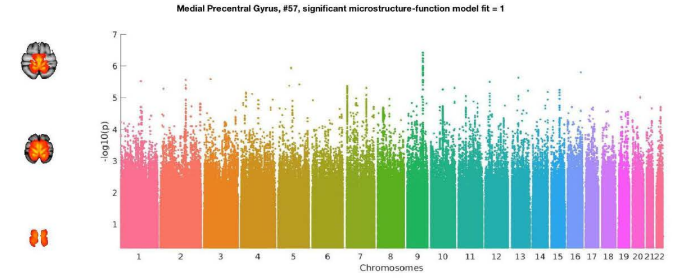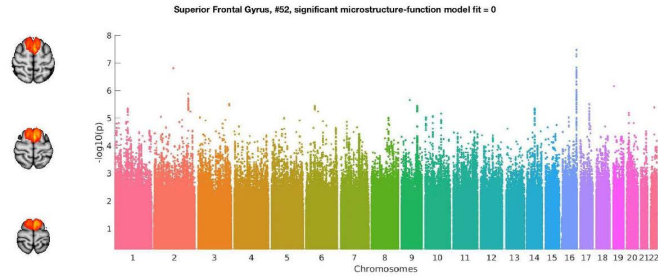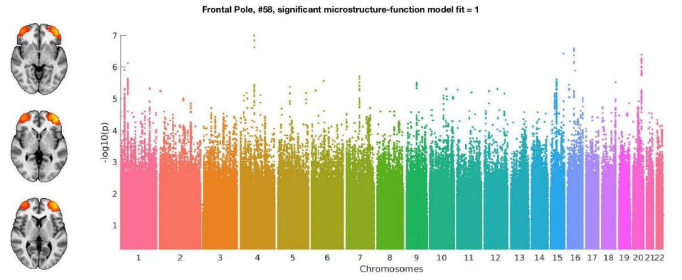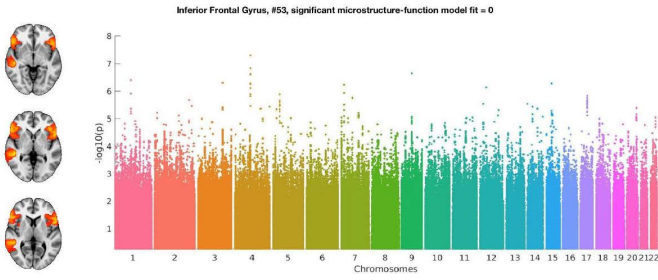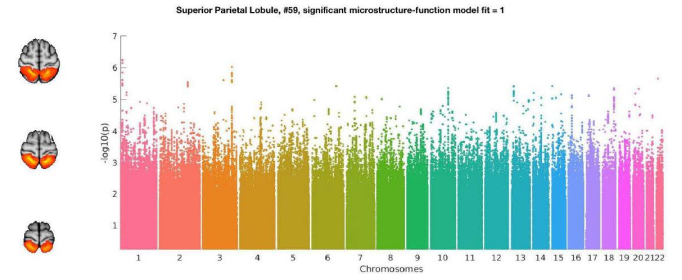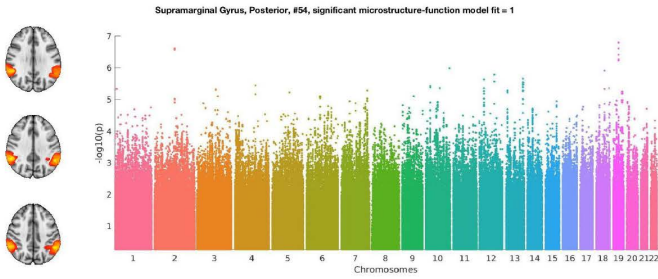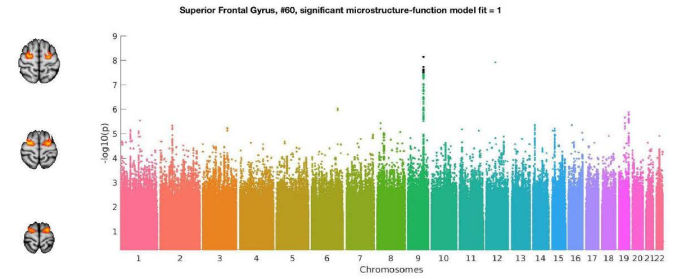

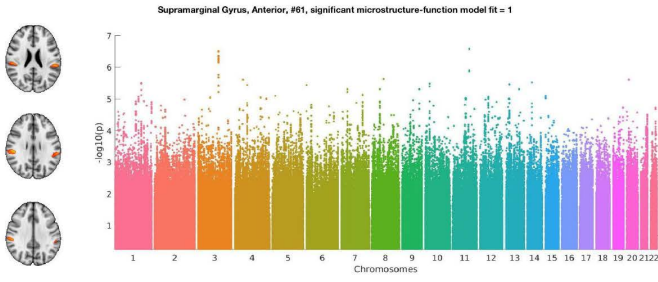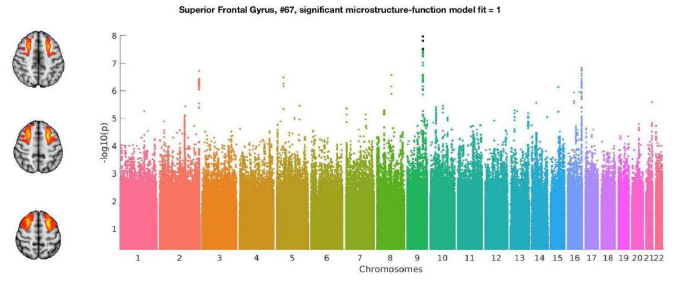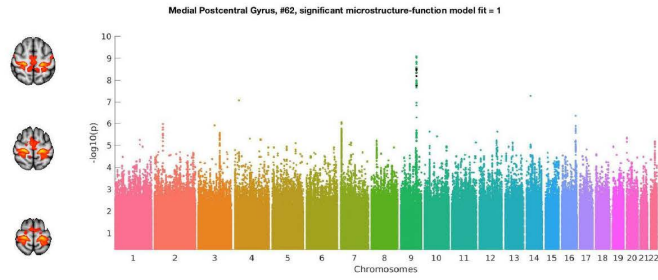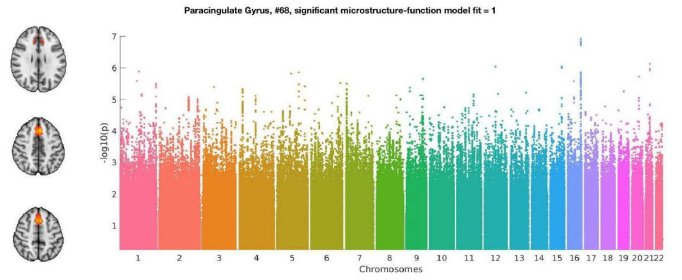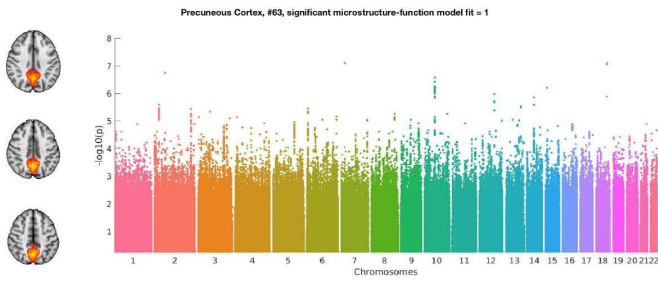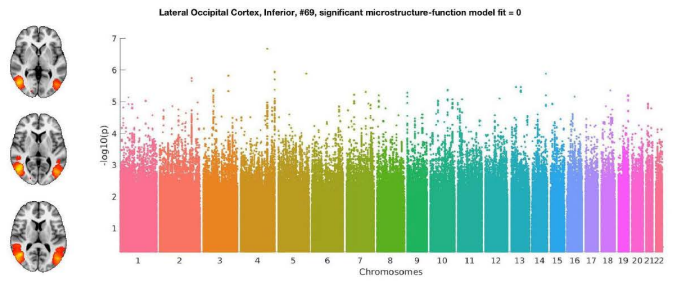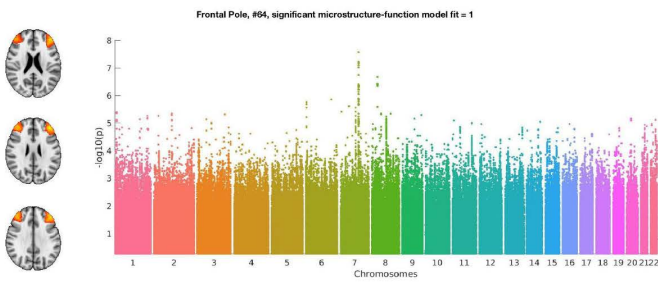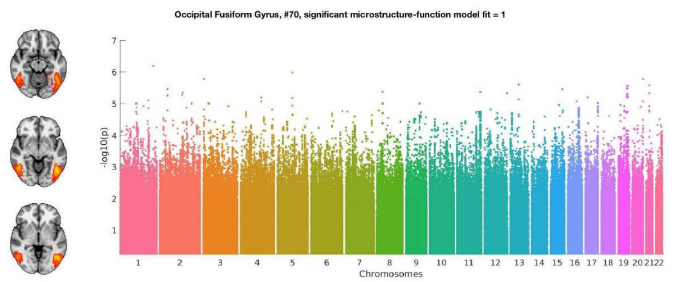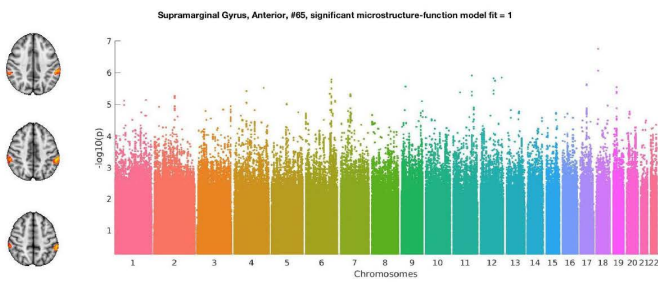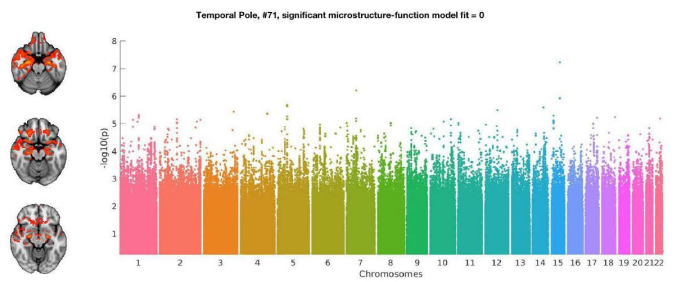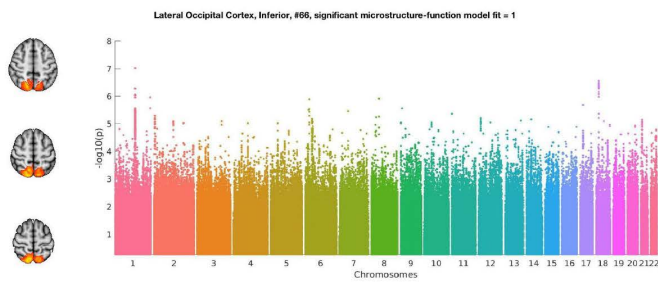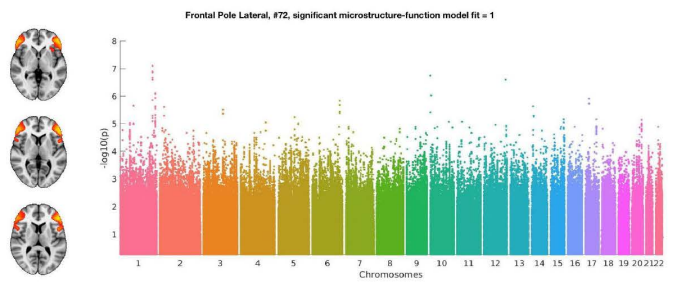

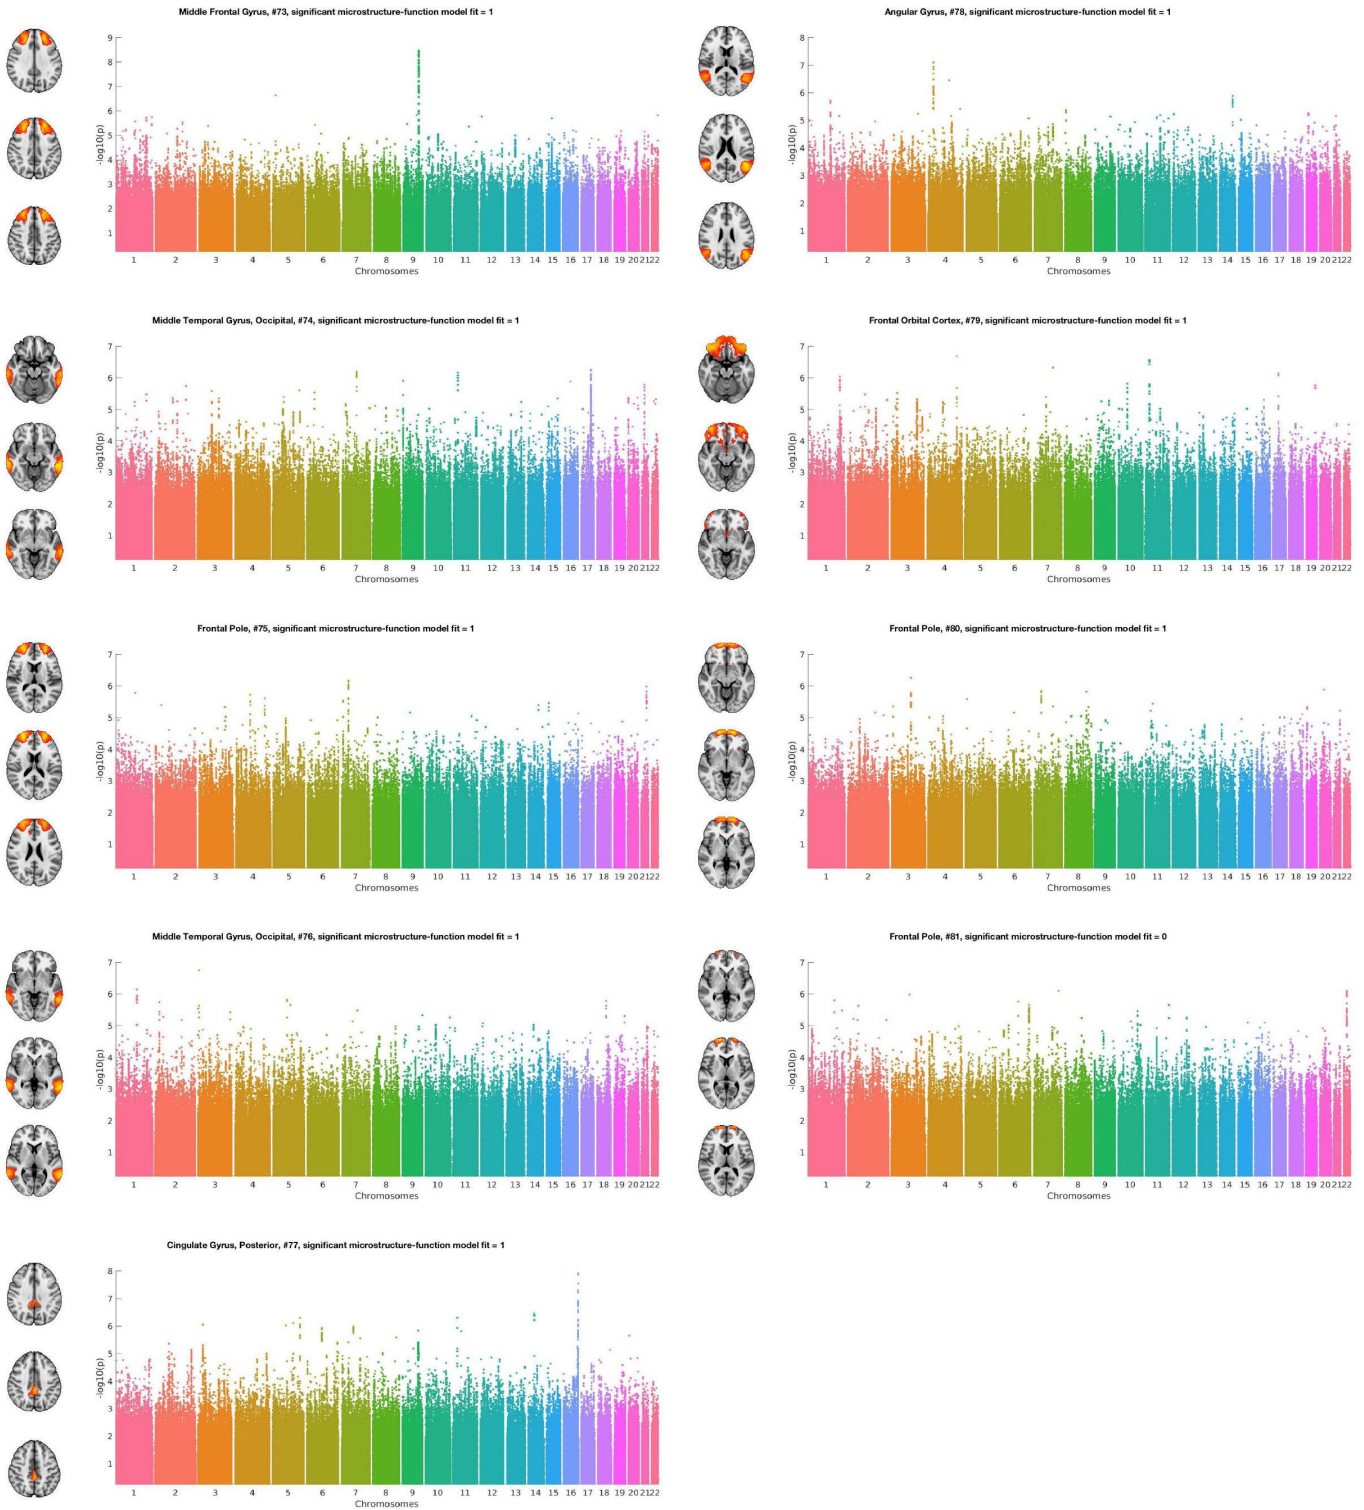

## Supplementary Figure 9

### Genome-wide association results for all homotopic region pairs.

Genome-wide associations (linear regression, two-sided) with the microstructure-function phenotype (i.e. the pattern of functional connectivity that can be predicted from white matter microstructure). The Manhattan plots depict the associations with each SNP across all chromosomes expressed as the  $-\log_{10}(p\text{-value})$ . Each Manhattan plot shows the association of the microstructure-function model fit of a homotopic region pair for the discovery cohort (n = 7481 subjects). The significance threshold was set to a  $-\log_{10}(P)$  equal to 7.5 corresponding to a p-value of  $\sim 3 \times 10^{-8}$ .

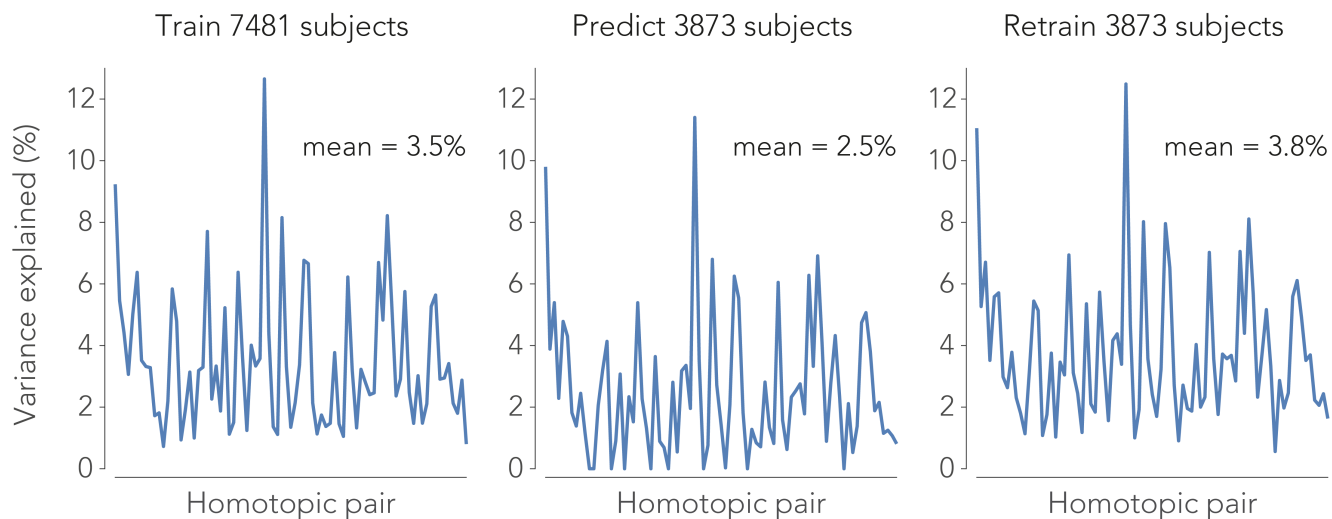

**Supplementary Figure 10.**

**Effect of cohort size and retraining models on the percentage variance explained by the multi-modal microstructure model.**

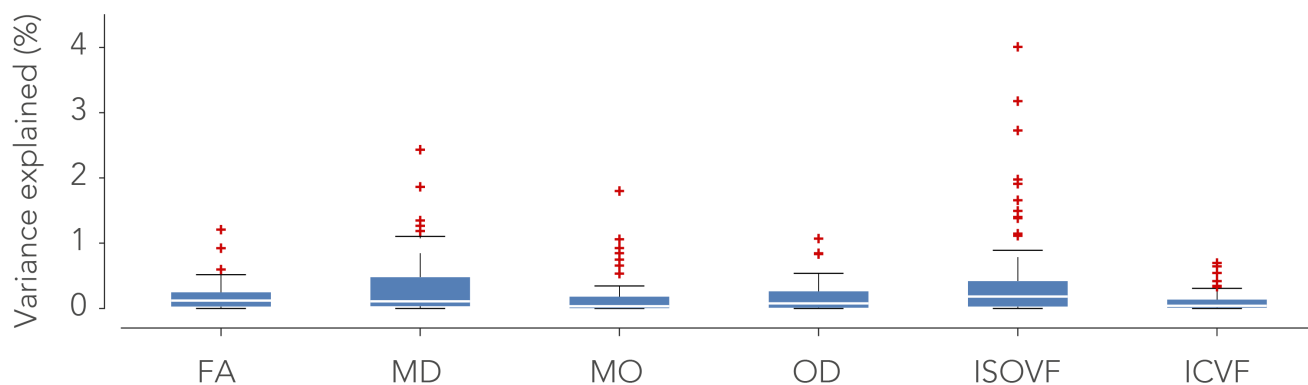

**Supplementary Figure 11.**

**Univariate modelling of white matter microstructure to predict functional connectivity.**

Boxplots of percentage variance explained in functional connectivity between the homotopic region pairs by the microstructural mean of a white matter tract as opposed to the rich microstructural signature generated using principal components analysis for the training cohort ( $n = 7481$  subjects). The centre line depicts the median variance explained values across the homotopic region pairs; box limits, the 25<sup>th</sup> and 75<sup>th</sup> percentiles; the whiskers extend to the most extreme data points excluding outliers (marked with a + symbol).

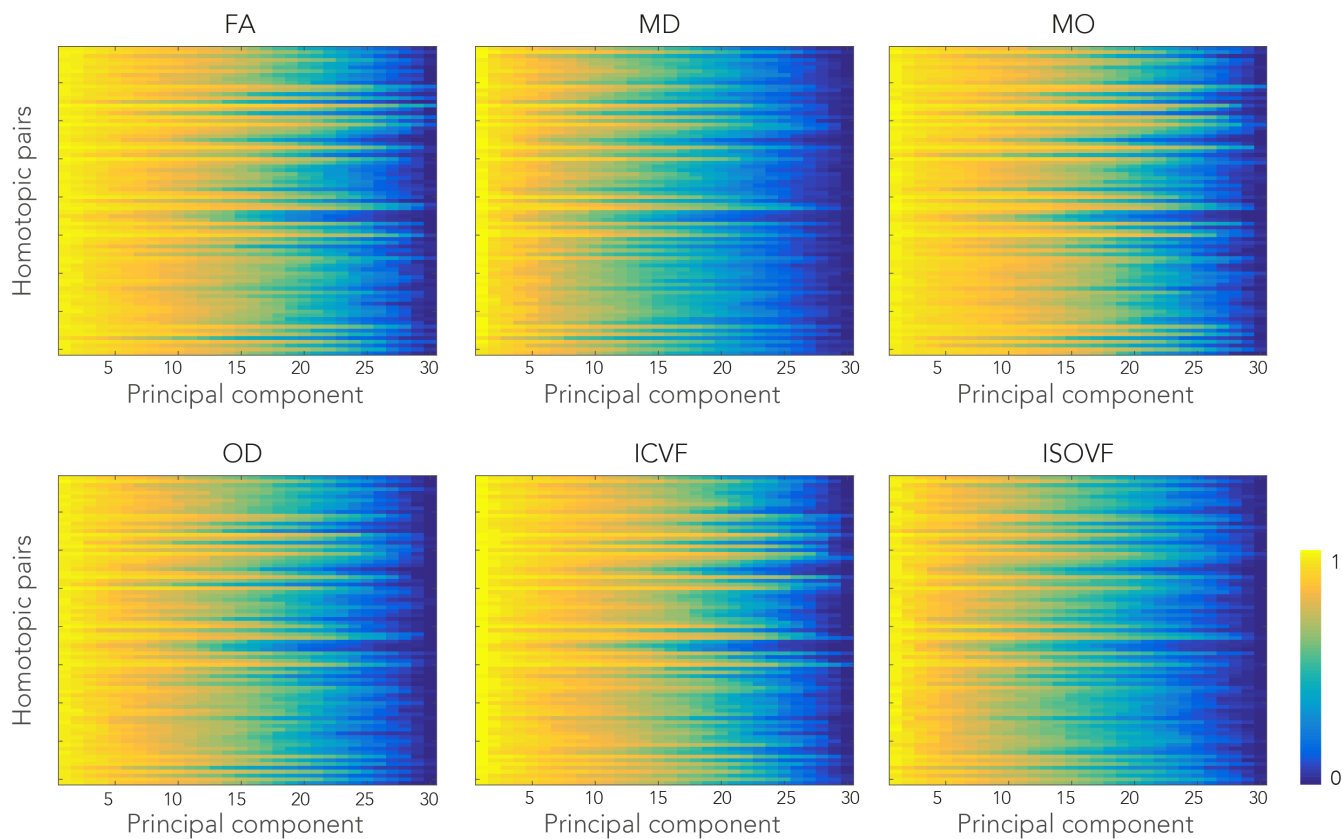

**Supplementary Figure 12.**

**Canonical correlation analysis between microstructural principal components derived from two registration methods to align the dMRI volumes.**

7481 subjects were aligned using either FNIRT-based FA registration or using DTITK registration incorporating the full tensor. After applying the warfields to each microstructural volume, the microstructural metrics were extracted from the tract skeletons connecting a given homotopic region pair for all subjects. Next, a principal components analysis was performed on these microstructural matrices (see Fig. 2 for an overview). To evaluate whether FNIRT and DTITK yield principal components that carry the same information, a canonical correlation analysis was performed to maximize the overlap between the two subspaces. Each entry in the matrices above represents the correlation coefficient (i.e., the cosine of the principal angle) between the principal components generated FNIRT and DTITK for a given white matter tract. Especially the top principal components show a high degree of similarity, whereas principal components carrying less variance are probably more susceptible to noise or mis-registration. The effect of both registration approaches on model performance is given in Supplementary Fig. 13.



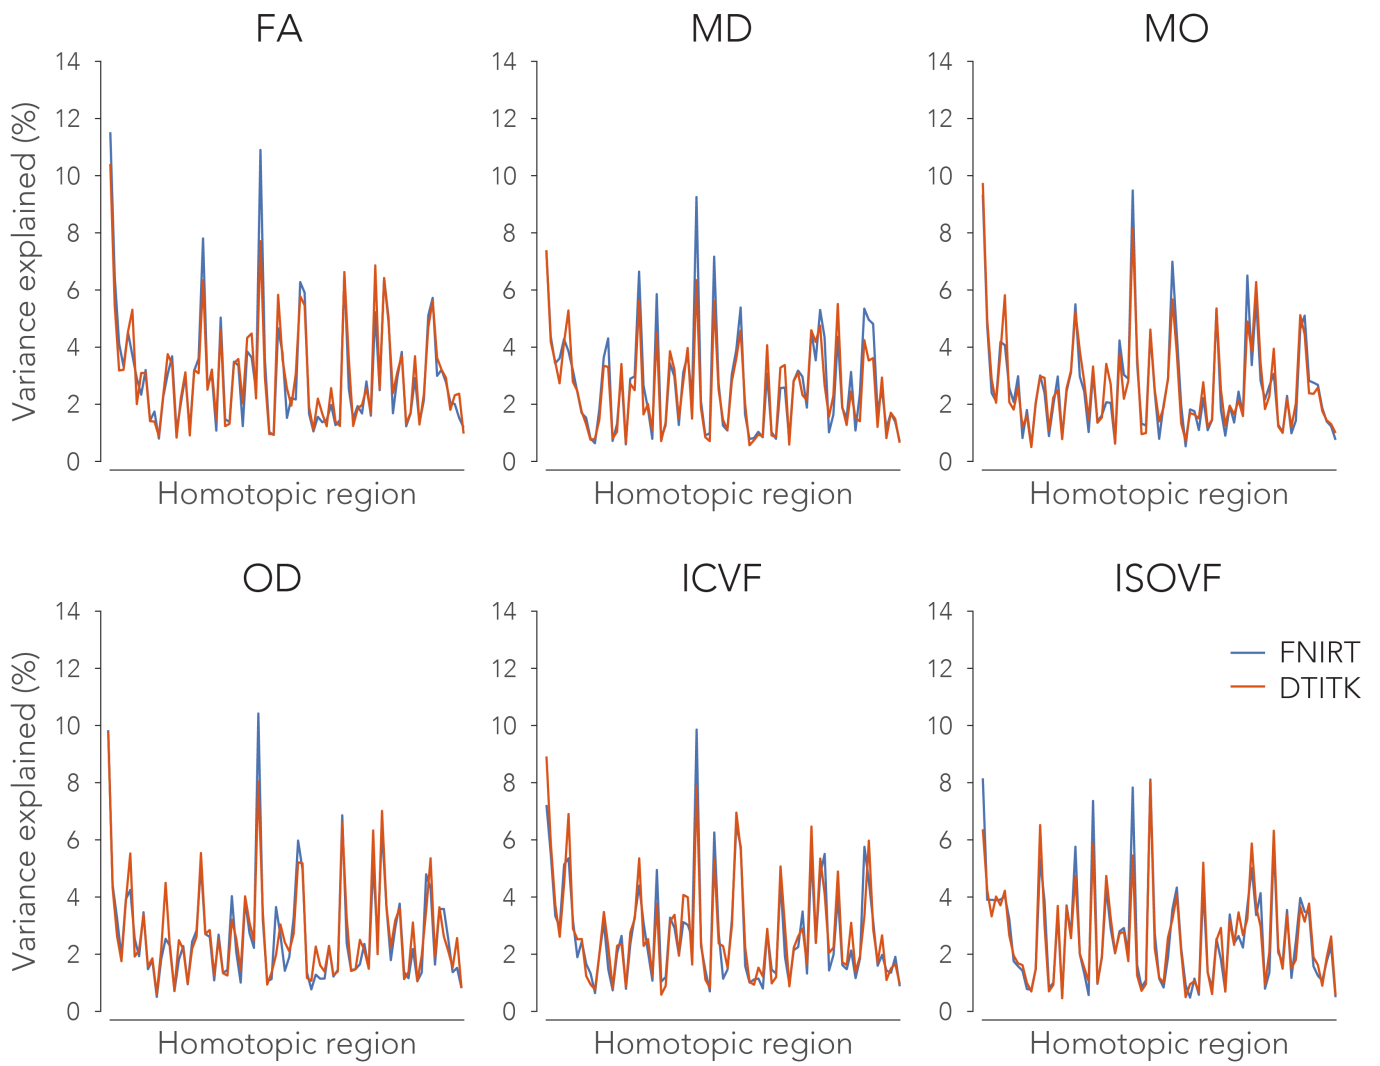

**Supplementary Figure 13.**

**Model performance for the two registration approaches; optimized FNIRT and DTITK.**

In terms of percentage variance explained in functional connectivity by white matter microstructure, the difference between the registration algorithms to align the dMRI data is negligible for all microstructural metrics. See Supplementary Fig. 12 caption for more information.

## Supplementary Table 1.

Brain areas corresponding to the homotopic regions according to the Harvard-Oxford cortical structural atlas. The spatial maps can be found in Figure 1.A. Percentage variance explained – for the training and replication cohort – by the multimodal microstructure models to predict functional homotopic connectivity is given for each area. The coordinates of the brain area in the left hemisphere is given for the Montreal Neurological Institute (MNI) 2 mm standard space atlas. Figure 5 depicts the explained variance on a brain surface for each of the homotopic region pairs.

| Area | Name                               | MNI (x,y,z) | Variance explained (%) |             | Area | Name                               | MNI (x,y,z) | Variance explained (%) |             |
|------|------------------------------------|-------------|------------------------|-------------|------|------------------------------------|-------------|------------------------|-------------|
|      |                                    |             | Training               | Replication |      |                                    |             | Training               | Replication |
| 1    | Intracalcarine Cortex              | 51, 26, 42  | 9.24                   | 9.79        | 42   | Middle Temporal Gyrus, posterior   | 74, 51, 33  | 2.14                   | 0.03        |
| 2    | Central Opercular Cortex           | 70, 57, 43  | 5.46                   | 3.88        | 43   | Superior Temporal Gyrus            | 71, 52, 40  | 3.38                   | 2.07        |
| 3    | Cingulate Gyrus                    | 49, 57, 61  | 4.42                   | 5.38        | 44   | Lateral Occipital Cortex, Superior | 61, 33, 58  | 6.77                   | 6.24        |
| 4    | Occipital Fusiform Gyrus           | 57, 25, 34  | 3.06                   | 2.28        | 45   | Inferior Frontal Gyrus             | 66, 70, 52  | 6.66                   | 5.53        |
| 5    | Lateral Occipital Cortex, Superior | 59, 26, 50  | 5.00                   | 4.78        | 46   | Paracingulate Gyrus                | 47, 75, 60  | 2.13                   | 1.82        |
| 6    | Precentral Gyrus                   | 66, 60, 60  | 6.38                   | 4.29        | 47   | Inferior Temporal Gyrus            | 63, 39, 29  | 1.13                   | 0.00        |
| 7    | Temporal Occipital Fusiform Cortex | 59, 35, 31  | 3.52                   | 1.82        | 48   | Superior Parietal Lobule           | 61, 36, 58  | 1.74                   | 1.28        |
| 8    | Precuneus Cortex                   | 48, 36, 49  | 3.32                   | 1.39        | 49   | Insular Cortex                     | 64, 75, 37  | 1.37                   | 0.84        |
| 9    | Angular Gyrus                      | 66, 30, 55  | 3.28                   | 2.44        | 50   | Frontal Pole                       | 62, 80, 30  | 1.48                   | 0.71        |
| 10   | Frontal Pole                       | 58, 75, 60  | 1.72                   | 1.16        | 51   | Precentral Gyrus                   | 59, 61, 61  | 3.77                   | 2.81        |
| 11   | Middle Temporal Gyrus, posterior   | 76, 51, 31  | 1.81                   | 0.00        | 52   | Superior Frontal Gyrus             | 51, 78, 58  | 1.46                   | 1.34        |
| 12   | Frontal Medial Cortex              | 50, 91, 37  | 0.73                   | 0.00        | 53   | Inferior Frontal Gyrus             | 69, 72, 39  | 1.05                   | 0.82        |
| 13   | Supramarginal Gyrus, Posterior     | 71, 58, 49  | 2.19                   | 2.05        | 54   | Supramarginal Gyrus, Posterior     | 71, 38, 54  | 6.23                   | 6.04        |
| 14   | Frontal Medial Cortex              | 49, 86, 43  | 5.84                   | 3.19        | 55   | Precuneus Cortex                   | 48, 44, 58  | 3.21                   | 1.58        |
| 15   | Cingulate Gyrus, Posterior         | 47, 41, 49  | 4.79                   | 4.13        | 56   | Middle Temporal Gyrus, posterior   | 75, 52, 30  | 1.33                   | 0.63        |
| 16   | Frontal Pole                       | 61, 80, 29  | 0.94                   | 0.00        | 57   | Medial Precentral Gyrus            | 50, 49, 68  | 3.23                   | 2.32        |
| 17   | Supramarginal Gyrus, Posterior     | 72, 42, 47  | 1.93                   | 0.90        | 58   | Frontal Pole                       | 63, 88, 37  | 2.81                   | 2.52        |
| 18   | Parahippocampal Gyrus              | 56, 52, 30  | 3.14                   | 3.07        | 59   | Superior Parietal Lobule           | 56, 39, 65  | 2.40                   | 2.75        |
| 19   | Middle Temporal Gyrus, Anterior    | 76, 58, 28  | 1.00                   | 0.00        | 60   | Superior Frontal Gyrus             | 56, 60, 68  | 2.46                   | 1.78        |
| 20   | Occipital Pole                     | 50, 22, 36  | 3.19                   | 2.33        | 61   | Supramarginal Gyrus, Anterior      | 72, 46, 49  | 6.70                   | 6.27        |
| 21   | Superior Temporal Gyrus            | 70, 58, 32  | 3.30                   | 1.52        | 62   | Medial Postcentral Gyrus           | 58, 52, 62  | 4.83                   | 3.32        |
| 22   | Parahippocampal Gyrus, Posterior   | 53, 38, 38  | 7.70                   | 5.38        | 63   | Precuneus Cortex                   | 48, 35, 58  | 8.22                   | 6.90        |
| 23   | Lateral Occipital Cortex, Superior | 64, 25, 50  | 2.26                   | 2.27        | 64   | Frontal Pole                       | 64, 81, 49  | 5.36                   | 4.07        |
| 24   | Precuneus Cortex                   | 49, 38, 62  | 3.33                   | 1.31        | 65   | Supramarginal Gyrus, Anterior      | 74, 45, 57  | 2.36                   | 0.89        |
| 25   | Middle Frontal Gyrus               | 56, 70, 60  | 1.88                   | 0.00        | 66   | Lateral Occipital Cortex, Inferior | 51, 30, 65  | 2.91                   | 2.79        |
| 26   | Superior Frontal Gyrus             | 54, 81, 57  | 5.23                   | 3.64        | 67   | Superior Frontal Gyrus             | 57, 68, 64  | 5.75                   | 4.32        |
| 27   | Middle Frontal Gyrus               | 71, 63, 21  | 1.12                   | 0.89        | 68   | Paracingulate Gyrus                | 47, 74, 57  | 2.48                   | 2.32        |
| 28   | Occipital Pole                     | 53, 18, 43  | 1.51                   | 0.69        | 69   | Lateral Occipital Cortex, Inferior | 69, 29, 40  | 1.47                   | 0.00        |
| 29   | Cingulate Gyrus, Anterior          | 47, 74, 50  | 6.38                   | 0.00        | 70   | Occipital Fusiform Gyrus           | 67, 31, 31  | 3.02                   | 2.11        |
| 30   | Frontal Operculum Cortex           | 63, 68, 36  | 3.64                   | 2.80        | 71   | Temporal Pole                      | 60, 63, 24  | 1.48                   | 0.53        |
| 31   | Occipital Pole                     | 59, 18, 33  | 1.24                   | 0.55        | 72   | Frontal Pole Lateral               | 67, 77, 39  | 2.11                   | 1.38        |
| 32   | Cuneal Cortex                      | 50, 24, 50  | 4.01                   | 3.17        | 73   | Middle Frontal Gyrus               | 58, 83, 51  | 5.27                   | 4.73        |
| 33   | Supramarginal Gyrus, Anterior      | 68, 44, 57  | 3.34                   | 3.35        | 74   | Middle Temporal Gyrus, Occipital   | 75, 47, 28  | 5.64                   | 5.06        |
| 34   | Inferior Frontal Gyrus             | 71, 66, 49  | 3.58                   | 1.96        | 75   | Frontal Pole                       | 57, 90, 45  | 2.91                   | 3.80        |
| 35   | Cingulate Gyrus, Posterior         | 49, 38, 51  | 12.66                  | 11.39       | 76   | Middle Temporal Gyrus, Occipital   | 73, 38, 37  | 2.95                   | 1.88        |
| 36   | Angular Gyrus                      | 62, 35, 58  | 4.40                   | 3.51        | 77   | Cingulate Gyrus, Posterior         | 47, 46, 55  | 3.41                   | 2.15        |
| 37   | Pre/Postcentral Gyri               | 63, 49, 65  | 1.36                   | 0.00        | 78   | Angular Gyrus                      | 70, 32, 47  | 2.13                   | 1.15        |
| 38   | Supplementary Motor Cortex         | 48, 57, 61  | 1.11                   | 0.76        | 79   | Frontal Orbital Cortex             | 57, 83, 29  | 1.80                   | 1.25        |
| 39   | Superior Frontal Gyrus             | 48, 85, 54  | 8.15                   | 6.79        | 80   | Frontal Pole                       | 52, 92, 33  | 2.88                   | 1.07        |
| 40   | Frontal Orbital Cortex             | 66, 76, 33  | 3.32                   | 2.72        | 81   | Frontal Pole                       | 54, 95, 40  | 0.80                   | 0.81        |
| 41   | Middle Frontal Gyrus               | 65, 73, 58  | 1.35                   | 1.43        |      |                                    |             |                        |             |

### Supplementary Table 2.

Genome-wide associations (linear regression, two-sided) with the residuals of microstructure-function phenotype (i.e. the pattern of functional connectivity that cannot be explained by white matter microstructure). Listed is the rsid of the SNP showing the most significant association. Additionally, the brain area is reported (see Supplementary Table 1), the nearest gene of the SNP, the base-pair position, the SNP alleles, the minor allele frequency (maf) and the p-values of the discovery (n = 7481 subjects) and the replication GWAS (n = 3873 subjects) are given. A significance threshold is given for a  $-\log_{10}(\text{p-value})$  equal to 7.5 corresponding to a p-value of  $\sim 3 \times 10^{-8}$ . Significance threshold for the replication GWAS was determined using Bonferroni correction ( $p < 2.9 \times 10^{-3}$ ).

| chr | area | rsid      | nearest gene | position | ref allele | minor allele | maf  | p-value  | replication p-value |
|-----|------|-----------|--------------|----------|------------|--------------|------|----------|---------------------|
| 10  | 30   | rs7080472 | PLCE1        | 96012950 | G          | G            | 0.42 | 7.48E-10 | 5.98E-05            |

### Supplementary Table 3.

Genome-wide associations (linear regression, two-sided) with the first principal component of the multi-modal microstructure phenotype of each white matter tract. Listed are rsids of the SNPs showing the most significant association that were replicated in the replication cohort. Additionally, the white matter tract is reported (connecting the areas as listed in Supplementary Table 1), the nearest gene of each SNP, the base-pair position, the SNP alleles, the minor allele frequency (maf) and the p-values of the discovery (n = 7481 subjects) and the replication GWAS (n = 3873 subjects) are given. A significance threshold is given for a  $-\log_{10}(\text{p-value})$  equal to 7.5 corresponding to a p-value of  $\sim 3 \times 10^{-8}$ . Significance threshold for the replication GWAS was determined using Bonferroni correction ( $p < 3.6 \times 10^{-4}$ ).

| chr | tract | rsid       | nearest gene | position  | ref allele | minor allele | maf  | p-value  | replication p-value |
|-----|-------|------------|--------------|-----------|------------|--------------|------|----------|---------------------|
| 3   | 3     | rs13083859 | GMNC         | 190662703 | G          | G            | 0.38 | 2.60E-08 | 8.17E-06            |
|     | 4     | rs10937450 |              | 190652328 | G          | G            | 0.38 | 3.69E-10 | 9.66E-08            |
|     | 20    | rs10937450 |              | 190652328 | G          | G            | 0.38 | 1.37E-09 | 6.40E-07            |
|     | 25    | rs13066753 |              | 190647187 | C          | C            | 0.39 | 9.87E-09 | 3.38E-07            |
|     | 28    | rs10937450 |              | 190652328 | G          | G            | 0.38 | 1.02E-08 | 2.14E-07            |
|     | 31    | rs10937450 |              | 190652328 | G          | G            | 0.38 | 5.08E-10 | 6.77E-08            |
|     | 34    | rs13066753 |              | 190647187 | C          | C            | 0.39 | 2.39E-08 | 2.03E-05            |
|     | 60    | rs13100545 |              | 190657895 | A          | A            | 0.38 | 1.11E-08 | 1.34E-05            |
|     | 62    | rs13066848 |              | 190668204 | T          | T            | 0.38 | 3.14E-08 | 7.22E-06            |
| 5   | 12    | rs13180395 | VCAN         | 82716119  | T          | T            | 0.30 | 1.67E-09 | 4.01E-08            |
|     | 14    | rs13180395 |              | 82716119  | T          | T            | 0.30 | 7.99E-09 | 1.27E-07            |
|     | 75    | rs4470745  |              | 82789647  | A          | A            | 0.41 | 8.86E-09 | 6.42E-06            |
|     | 81    | rs4470745  |              | 82789647  | A          | A            | 0.41 | 1.32E-09 | 1.40E-07            |

#### Supplementary Table 4.

List of confound variables for the microstructure-function models.

| Cumulative count | Confound variable name                                                                               |
|------------------|------------------------------------------------------------------------------------------------------|
| 1                | Age                                                                                                  |
| 2                | Age squared                                                                                          |
| 3                | Age * sex                                                                                            |
| 4                | Age squared * sex                                                                                    |
| 5                | Age ( <i>quantile normalised</i> )                                                                   |
| 6                | Age squared ( <i>quantile normalised</i> )                                                           |
| 7                | Age * sex ( <i>quantile normalised</i> )                                                             |
| 8                | Age squared * sex ( <i>quantile normalised</i> )                                                     |
| 9                | rfMRI head motion                                                                                    |
| 10               | tfMRI head motion                                                                                    |
| 11               | Head size scaling                                                                                    |
| 12               | rfMRI head motion squared                                                                            |
| 13               | tfMRI head motion squared                                                                            |
| 17               | 4 confounds relating to bed position in scanner (x,y,z,table)                                        |
| 21               | 4 confounds relating to bed position in scanner (x,y,z,table)                                        |
| 31               | 10 confounds modelling slow date-related drift                                                       |
| 32               | rfMRI head motion ( <i>quantile normalised</i> )                                                     |
| 33               | tfMRI head motion ( <i>quantile normalised</i> )                                                     |
| 34               | Head size scaling ( <i>quantile normalised</i> )                                                     |
| 38               | 4 confounds relating to bed position in scanner (x,y,z,table) ( <i>quantile normalised</i> )         |
| 42               | 4 confounds relating to bed position in scanner (x,y,z,table) squared ( <i>quantile normalised</i> ) |
| 52               | 10 confounds modelling slow date-related drift ( <i>quantile normalised</i> )                        |
| 53               | Imaging centre                                                                                       |
| 54               | Sex                                                                                                  |
| 55               | White matter lesion volume                                                                           |
| 57               | 2 dMRI EDDY movement parameters                                                                      |
| 58               | Inverse T1 SNR                                                                                       |
| 59               | Inverse REST SNR                                                                                     |
| 60               | White matter lesion volume ( <i>quantile normalised</i> )                                            |
| 62               | 2 dMRI EDDY movement parameters ( <i>quantile normalised</i> )                                       |
| 63               | Inverse T1 SNR ( <i>quantile normalised</i> )                                                        |
| 64               | Inverse REST SNR ( <i>quantile normalised</i> )                                                      |
